1 **Cytoplasmic and nuclear Sw-5b synergistically induce plant**  
2 **immune responses to inhibit different viral infection steps**

3 Hongyu Chen<sup>1,2,†</sup>, Xin Qian<sup>1,3,†</sup>, Xiaojiao Chen<sup>1,4,†</sup>, Tongqing Yang<sup>1,2</sup>, Mingfeng Feng<sup>1,2</sup>, Jing  
4 Chen<sup>1,2</sup>, Ruixiang Cheng<sup>1,2</sup>, Hao Hong<sup>1,2</sup>, Ying Zheng<sup>1</sup>, Yuzhen Mei<sup>5</sup>, Danyu Shen<sup>1,2</sup>, Yi Xu<sup>1,2</sup>,  
5 Min Zhu<sup>1,2</sup>, Xin Shun Ding<sup>1</sup> and Xiaorong Tao<sup>1,2,\*</sup>

6 <sup>1</sup> Department of Plant Pathology, College of Plant Protection, Nanjing Agricultural University,  
7 Nanjing 210095, P. R. China.

8 <sup>2</sup> Key Laboratory of Plant Immunity, Nanjing Agricultural University, Nanjing 210095, P. R.  
9 China.

10 <sup>3</sup> Huaiyin Institute of Agricultural Sciences of Xuhuai Region in Jiangsu , Huaian 223001, Jiangsu,  
11 P. R. China.

12 <sup>4</sup> College of Plant Protection, Yunnan Agricultural University, Kunming 650201, Yunnan, P. R.  
13 China.

14 <sup>5</sup> State Key Laboratory of Rice Biology, Institute of Biotechnology, Zhejiang University,  
15 Hangzhou 310029, P. R. China.

16

17 <sup>†</sup> These authors contributed equally to this work.

18

19 \*For Correspondence:

20 taoxiaorong@njau.edu.cn

21

22 **Running Title**

23 **Sw-5b-mediated immunity against different viral infection steps**

24 **Abstract**

25 Plant intracellular nucleotide binding-leucine-rich repeat (NLR) receptors play critical  
26 roles in mediating host immunity to pathogen attack. Successful virus infection in  
27 plant involves several essential steps including viral replication, intercellular and  
28 long-distance movement. How plant NLRs induce resistances against virus infection  
29 remains largely unknown. We demonstrated here that tomato NLR Sw-5b locates to  
30 cytoplasm and nucleus, respectively, to play different roles in inducing host  
31 resistances against tospovirus infection. The cytoplasmic Sw-5b functions to induce a  
32 strong cell death response to inhibit TSWV replication. This host response is,  
33 however, insufficient to block viral intercellular and long-distance movement. The  
34 nucleus-localized Sw-5b triggers a host defense that weakly inhibit viral replication  
35 but strongly impede virus intercellular and systemic movement. Furthermore, the  
36 cytoplasmic and nuclear Sw-5b act synergistically to confer a strong immunity to  
37 TSWV infection. Our finding adds a new knowledge to our current understanding on  
38 the plant NLRs-triggered immunity against virus infection.

39

40

41

42

43

44

45

46 **Introduction**

47 Plant innate immunity plays critical roles in host defense against pathogen invasions,  
48 and is triggered by cell-surface receptors or intracellular nucleotide-binding  
49 leucine-rich repeat (NLR) receptors (Soosaar et al., 2005; Dodds and Rathjen, 2010;  
50 Cui et al., 2015; Li et al., 2015; Jones et al., 2016; Kourelis and van der Hoorn, 2018;  
51 Kapos et al., 2019; van Wersch, 2020). Plant intracellular NLRs are the largest classes  
52 of resistance proteins that function to detect pathogen effectors, and to activate host  
53 immunity upon pathogen attack (Caplan et al., 2008a; Takken and Goverse, 2012; Li  
54 et al., 2015; Jones et al., 2016; Kourelis and van der Hoorn, 2018; Kapos et al., 2019).  
55 Plant NLRs typically contain an N-terminal domain, a central nucleotide-binding  
56 domain (NB), a nucleotide-binding adaptor (ARC domain shared by Apaf-1, certain  
57 resistance proteins, and CED-4), and a C-terminal leucine-rich repeat (LRR) domain  
58 (Ea and Jones, 1998; Jones et al., 2016; Ma et al., 2018; Wang et al., 2019a; Wang et  
59 al., 2019b; Ma et al., 2020). Based on the differences among the N-terminal domains,  
60 plant NLRs can be further divided into two main categories, known as the coiled-coil  
61 NLR (refers to as CNL) category and the Toll/interleukin-1 receptor NLR (TNL)  
62 category (Meyers et al., 2003; Collier and Moffett, 2009; Qi and Innes, 2013). The  
63 CC- or the TIR-domain-bearing NLRs have distinct genetic requirements and can  
64 regulate different functions in the downstream of defense signaling (Collier and  
65 Moffett, 2009; Qi and Innes, 2013; Horsefield et al., 2019; Jubic et al., 2019; van  
66 Wersch and Li, 2019; Wan et al., 2019).

67 Translocations of plant NLRs into proper subcellular compartments are critical for

68 the induction of innate immunity (Cui et al., 2015; van Wersch, 2020). Multiple plant  
69 NLRs and immune regulators, including tobacco N, Arabidopsis snc1, RRS1/RPS4,  
70 barley MLA10, and Arabidopsis EDS1, NPR1, have been shown to accumulate in  
71 both cytoplasm and nucleus, and for several nucleocytoplasmic NLRs accumulation  
72 in nucleus is required for triggering host resistance to pathogen infections (Deslandes  
73 et al., 2003; Burch-Smith et al., 2007; Shen et al., 2007; Wirthmueller et al., 2007;  
74 Tasset et al., 2010; Bai et al., 2012; Inoue et al., 2013; Padmanabhan et al., 2013).  
75 Wheat Sr33, a homolog of barley MLA10, however, was reported to accumulate in  
76 cytoplasm to induce host resistance against stem rust pathogen (Cesari et al., 2016).  
77 For potato Rx, a balanced cytoplasm and nucleus accumulation of Rx is needed to  
78 induce the host immunity (Slootweg et al., 2010; Tameling et al., 2010). Other studies  
79 have shown that Arabidopsis Rpm1 (Gao et al., 2011), RPS2 (Axtell and Staskawicz,  
80 2003), RPS5 (Qi et al., 2012), rice Pit (Takemoto et al., 2012), and tomato Tm-2<sup>2</sup>  
81 (Chen et al., 2017; Wang et al., 2020) need to associate with plasma membrane in  
82 order to trigger cell death and host immunity. Latest studies have shown that the  
83 activated Arabidopsis ZAR1 can bind to cellular membrane, leading to a membrane  
84 leakage followed by cell death and host immunity (Wang et al., 2019a; Wang et al.,  
85 2019b). Flax L6 and M have been shown to accumulate in both Golgi apparatus and  
86 tonoplast, and these compartmentalized localizations are necessary for the induction  
87 of host resistance (Kawano et al., 2014). The re-distribution of potato R3a from  
88 cytosol to endosomal compartments is crucial for the induction of host resistance to  
89 *Phytophthora infestans* infection (Engelhardt et al., 2012). Different plant NLRs have

90 diverse subcellular localizations for their proper functions. However, how the  
91 compartmentalized localizations of plant NLRs specifically regulate defense signaling  
92 remain largely unknown.

93 Successful virus infection in plant requires viral replication in the initially infected  
94 cells followed by cell-to-cell and long-distance movement (Heinlein, 2015; Wang,  
95 2015). After entering into plant cells, virus first encode multiple proteins needed for  
96 its replication. Once the initial replication is established, virus will encode specific  
97 protein(s), known as movement proteins (MPs), to traffic viral genome or virions into  
98 adjacent cells through plasmodesmata in cell walls, and then long-distantly into other  
99 parts of the plant to cause a systemic infection (Rao, 2002; Lucas, 2006; Taliansky et  
100 al., 2008). To date, multiple plant NLRs, conferring host resistance against plant  
101 viruses have been identified (Soosaar et al., 2005; Meier et al., 2019), but how these  
102 plant NLRs induce host resistance against virus infection remain largely unknown.

103 Tospovirus is one of the most devastating plant virus worldwide and poses serious  
104 threats to global food security (Kormelink et al., 2011; Scholthof et al., 2011; Oliver  
105 and Whitfield, 2016). Tomato NLR Sw-5b confers a strong resistance to tospovirus  
106 infection and has been widely used in tomato breeding projects to produce tospovirus  
107 resistant tomato cultivars (Brommonschenkel et al., 2000; Spassova M I, 2001; Turina  
108 et al., 2016; Zhu et al., 2019). Upon recognition of tospovirus movement protein,  
109 NSm, Sw-5b can trigger a hypersensitive response (HR) , which typically associated  
110 with localized cell death (Lopez et al., 2011; Hallwass et al., 2014; Peiro et al., 2014;  
111 De Oliveira et al., 2016; Zhao et al., 2016; Leastro et al., 2017). We have previously

112 shown that Sw-5b can confer a broad-spectrum resistance to American type  
113 tospoviruses, including type species of tospovirus-tomato spotted wilt virus (TSWV),  
114 through recognition of a conserved 21 amino acid PAMP-like region in the viral NSm  
115 protein (Zhu et al., 2017). Sw-5b carries an extended N-terminal *Solanaceae* domain  
116 (SD), a CC domain, a NB-ARC domain, and a LRR domain (Brommonschenkel et al.,  
117 2000; Spassova M I, 2001; Lukasik-Shreepaathy et al., 2012). Similar SDs have also  
118 been found in the Mi-1.2, R8, Rpi-blb2, and Hero (Milligan et al., 1998; Vos et al.,  
119 1998; Ernst et al., 2002; van der Vossen et al., 2005; Lukasik-Shreepaathy et al., 2012;  
120 Vossen et al., 2016). More recently, Seong and others reported that the extended CNL  
121 is evolved initially in the ancestor of *Asterids* and *Amaranthaceae*, predated the  
122 *Solanaceae* family (Seong et al., 2020). In the presence of the extended N-terminal  
123 SD, Sw-5b is in an autoinhibited state through multilayered interactions between SD,  
124 CC, NB-ARC, and LRR domains (Chen et al., 2016). For activation, Sw-5b adopts a  
125 two-step strategy to recognize NSm through SD and then LRR domain (Li et al.,  
126 2019). This two-step recognition strategy significantly enhances the sensitivity of the  
127 detection on TSWV NSm. Although Sw-5b is known to localize in both cytoplasm  
128 and nucleus (De Oliveira et al., 2016), the biological roles of the cytoplasm- and the  
129 nucleus-accumulated Sw-5b in host immunity signalling are unknown.

130 In this study, we investigated the subcellular distribution pattern of Sw-5b and  
131 the functions of the compartmentalized Sw-5b in the induction of host immunity to  
132 TSWV infection. We have determined here that cytoplasm- and nucleus-accumulated  
133 Sw-5b functions differently in inducing host defense response to inhibit different

134 tospovirus infection steps. The cytoplasmic Sw-5b can induce a strong cell death  
135 response to suppress TSWV replication, whereas the nucleus-accumulated Sw-5b  
136 can induce a strong defense against viral intercellular movement and systemic  
137 infection. Combination of cytoplasmic and nuclear Sw-5b induces a synergistic and  
138 strong plant immunity against tospovirus infection. This finding has broad  
139 implications for future investigations on the roles of plant NLRs against different  
140 pathogen infection steps.

141

## 142 **Results**

### 143 **Determination of Sw-5b subcellular localization pattern**

144 Expression of YFP-Sw-5b in *N. benthamiana* leaves resulted in a strong HR cell death  
145 as well as Sw-5b (Chen et al., 2016; Zhu et al., 2017). To investigate the subcellular  
146 localization pattern of Sw-5b, we transiently expressed YFP and YFP-Sw-5b in *N.*  
147 *benthamiana* leaves, respectively, through agro-infiltration. Confocal Microscopy  
148 results showed that the YFP-Sw-5b fusion accumulated in both cytoplasm and nucleus  
149 in *N. benthamiana* leaf cells (Figure 1B, middle image). This subcellular localization  
150 pattern was similar to that of YFP (Figure 1B, left image). When a D857V mutation,  
151 which keeps Sw-5b in an autoactivated state (Chen et al., 2016), was introduced into  
152 Sw-5b to produce pYFP-Sw-5b<sup>D857V</sup> and expressed in *N. benthamiana* leaves, the  
153 mutant YFP-Sw-5b<sup>D857V</sup> fusion also accumulated in both cell cytoplasm and nucleus  
154 (Figure 1B, right image).

155 To investigate the subcellular localization pattern of Sw-5b in tomato leaf cells,

156 we transiently expressed YFP, YFP-Sw-5b, and YFP-Sw-5b<sup>D857V</sup>, respectively,  
157 through particle bombardment. Confocal Microscopy results showed that these three  
158 proteins exhibited the same subcellular localization pattern as that in the *N.*  
159 *benthamiana* leaf cells (Figure 1C).

160 To further confirm the above results, we harvested *N. benthamiana* leaves  
161 expressing YFP-Sw-5b or YFP-Sw-5b<sup>D857V</sup>. Leaf samples agro-infiltrated with the  
162 empty vector (p2300S) were also harvested and used as controls. Analyses of total  
163 protein, cytoplasm fractions, and nucleus fractions from these harvested leaves using  
164 Western blot assays showed that both YFP-Sw-5b and YFP-Sw-5b<sup>D857V</sup> were  
165 accumulated in the cytoplasm and nucleus (Figure 1D).

166

#### 167 **Sw-5b recognizes TSWV NSm in cytoplasm**

168 TSWV NSm is known to reside in cytoplasm and in plasmodesmata in cell walls, but  
169 not in nucleus (Kormelink et al., 1994; Feng et al., 2016). To determine where Sw-5b  
170 can recognize TSWV NSm, we fused a NES, a nes, a NLS or a nls signal peptide to  
171 the C-terminus of NSm-YFP to produce NSm-YFP-NES, NSm-YFP-nes,  
172 NSm-YFP-NLS, and NSm-YFP-nls, respectively. Transient expressions of these  
173 fusions in *N. benthamiana* leaves showed that NSm-YFP-NES accumulated  
174 exclusively in the cytoplasm, while NSm-YFP-NLS accumulated in the nucleus  
175 (Figure supplemental 1A). As expected, NSm-YFP-nes and NSm-YFP-nls showed the  
176 same accumulation pattern as that of NSm-YFP (Figure supplemental 1A). When  
177 Sw-5b was co-expressed with one of the above four fusions in *N. benthamiana* leaves



178 through agro-infiltration, the leaf tissues co-expressing Sw-5b and NSm-YFP-NES  
179 (Sw-5b + NSm-YFP-NES), Sw-5b and NSm-YFP-nes (Sw-5b + NSm-YFP-nes), or  
180 Sw-5b and NSm-YFP-nls (Sw-5b + NSm-YFP-nls) developed a strong HR cell death  
181 (Figure supplemental 1B). In contrast, the leaf tissues co-expressing Sw-5b and  
182 NSm-YFP-NLS (Sw-5b + NSm-YFP-NLS) did not. Western blot assays using an YFP  
183 specific antibody confirmed that all the assayed proteins were expressed in the  
184 infiltrated tissues (Figure supplemental 1C), indicating that Sw-5b recognizes NSm in  
185 the cytoplasm.

186

187 **Sw-5b activity in cell death induction is enhanced in the cytoplasm but**  
188 **suppressed in the nucleus**

189 To investigate the roles of the cytoplasmic and nuclear Sw-5b in the induction of cell  
190 death and host immunity, we produced constructs to express YFP-Sw-5b,  
191 NLS-YFP-Sw-5b, nls-YFP-Sw-5b, NES-YFP-Sw-5b, and nes-YFP-Sw-5b,  
192 respectively, and then tested their abilities to elicit cell death and host immunity to  
193 tospovirus infection. Transient expressions of these fusions in *N. benthamiana* leaves  
194 showed that NES-YFP-Sw-5b accumulated exclusively in the cytoplasm, while  
195 NLS-YFP-Sw-5b accumulated only in the nucleus (Figure 2A). In addition,  
196 nes-YFP-Sw-5b and nls-YFP-Sw-5b showed the same accumulation pattern as that  
197 shown by YFP-Sw-5b. We then tested cell death induction through co-expressions of  
198 NSm and YFP-Sw-5b (NSm + YFP-Sw-5b), NSm and NES-YFP-Sw-5b (NSm +  
199 NES-YFP-Sw-5b), NSm and nes-YFP-Sw-5b (NSm + nes-YFP-Sw-5b), NSm and

200 NLS-YFP-Sw-5b (NSm + NLS-YFP-Sw-5b), or NSm and nls-YFP-Sw-5b (NSm +  
201 nls-YFP-Sw-5b) in *N. benthamiana* leaves through agro-infiltration. Results of this  
202 study showed that the NSm + NES-YFP-Sw-5b-induced cell death was stronger than  
203 that induced by NSm + nes-YFP-Sw-5b or NSm + nls-YFP-Sw-5b co-expression  
204 (Figure 2B). In addition, the cell death induced by NSm + NLS-YFP-Sw-5b  
205 co-expression was suppressed (Figure 2B). Western blot results showed that the  
206 stronger cell death caused by NSm + NES-YFP-Sw-5b co-expression was not due to a  
207 greater accumulation of NES-YFP-Sw-5b in the leaves (Figure 2C). The ion leakage  
208 assay results (Figure 2D) agreed with the phenotype observation results, and indicated  
209 that co-expression of NSm + NES-YFP-Sw-5b in leaves lead to a greater ion leakage  
210 compared with that induced by the co-expression of NSm + nes-YFP-Sw-5b at 24 and  
211 48 hours post agro-infiltration (hpa). The ion leakage caused by the co-expression of  
212 NSm + NLS-YFP-Sw-5b was significantly weaker than that caused by the  
213 co-expression of NSm + nls-YFP-Sw-5b (Figure 2D).

214

### 215 **Cytoplasmic Sw-5b induces a strong host defense against tospovirus replication**

216 Virus infection in plant starts with virus replication in the initially infected cells  
217 followed by spreading into adjacent cells for further infection. To monitor tospovirus  
218 replication in plant cells, we recently developed a TSWV mini-replicon-based reverse  
219 genetic system (Feng et al., 2020). In this study, co-expression of TSWV  
220 mini-replicon  $SR_{(+)\text{eGFP}}$ ,  $L_{(+)\text{opt}}$  (with a codon usage optimized RdRp), VSRs and NSm  
221 resulted in a cell-to-cell movement of  $SR_{(+)\text{eGFP}}$ . In contrast, co-expression of  $SR_{(+)\text{eGFP}}$ ,

222 L<sub>(+)opt</sub>, VSRs, and NSm<sup>H93A&H94A</sup> mutant, a defective movement protein but can be  
223 recognized by Sw-5b to cause a strong HR (Zhao et al., 2016), in cells resulted in the  
224 expression of SR<sub>(-)eGFP</sub> in only single cells (Figure supplemental 2), thus dissecting the  
225 viral replication from viral cell-to-cell movement. We then co-expressed SR<sub>(+)eGFP</sub>,  
226 L<sub>(+)opt</sub>, VSRs, NSm<sup>H93A&H94A</sup> mutant and one of the five proteins (i.e., Sw-5b,  
227 NES-Sw-5b, nes-Sw-5b, NLS-Sw-5b, nls-Sw-5b) in *N. benthamiana* leaves. Leaves  
228 co-expressing SR<sub>(+)eGFP</sub>, L<sub>(+)opt</sub>, VSRs, NSm<sup>H93A&H94A</sup> mutant and p2300 (empty vector,  
229 EV) were used as controls. The results showed that in the presence of Sw-5b or one of  
230 its derivatives, the expression of SR<sub>(+)eGFP</sub> was strongly suppressed compared with  
231 that expressed in the presence of EV (Figure 3A). It is noteworthy that the expression  
232 of SR<sub>(+)eGFP</sub> was less inhibited in the presence of NLS-Sw-5b (Figure 3A). Western  
233 blot result indicated that the GFP accumulation of SR<sub>(+)eGFP</sub> was strongly inhibited in  
234 the presence of Sw-5b, NES-Sw-5b, nes-Sw-5b or nls-Sw-5b compared with that  
235 expressed in the presence of NLS-Sw-5b or EV (Figure 3B). This finding indicates  
236 that the cytoplasmic Sw-5b can inhibit SR<sub>(+)eGFP</sub> expression, possibly through  
237 induction of a host defense against TSWV replication.

238

### 239 **Sw-5b induces a host defense against viral NSm intercellular movement**

240 In our previous study, we used pmCherry-HDEL//NSm-GFP vector (Figure 4A) to  
241 investigate TSWV NSm cell-to-cell movement (Feng et al., 2016). The expressed  
242 mCherry-HDEL binds ER membrane in the initial cells but NSm-eGFP traffics  
243 between cells. To investigate whether the Sw-5b-induced host defense can affect

244 TSWV NSm cell-to-cell movement, we co-expressed mCherry-HDEL, NSm-GFP,  
245 and Sw-5b or mCherry-HDEL, NSm-GFP, and EV in *N. benthamiana* leaves through  
246 agro-infiltration. Under the fluorescence microscope, both NSm-GFP and  
247 mCherry-HDEL were found in single cells in the presence of Sw-5b. In the presence  
248 of EV, however, NSm-GFP moved into multiple cells, while mCherry-HDEL  
249 accumulated in the initial cells (Figure 4B, upper two panels). The result suggested  
250 that Sw-5b elicited a defense that strongly inhibited cell-to-cell movement of viral  
251 NSm.

252

253 **Sw-5b in the nucleus but not in the cytoplasm triggers a defense against NSm**  
254 **cell-to-cell movement**

255 To determine the effects of the cytoplasmic and nuclear Sw-5b on host defense against  
256 TSWV NSm intercellular movement, we co-expressed mCherry-HDEL and  
257 NSm-GFP with NES-Sw-5b, nes-Sw-5b, NLS-Sw-5b, or nls-Sw-5b in *N.*  
258 *benthamiana* leaves via agro-infiltration. The results showed that in the presence of  
259 NLS-Sw-5b, the cell-to-cell movement of NSm-GFP was inhibited (Figure 4B).  
260 Similar results were also obtained in the leaves co-expressing mCherry-HDEL and  
261 NSm-GFP with nls-YFP-Sw-5b or nes-YFP-Sw-5b (Figure supplemental 3). In the  
262 presence of NES-YFP-Sw-5b, however, NSm-GFP did move into surrounding cells.  
263 (Figure 4B). This finding indicates that the Sw-5b in the nucleus but not in the  
264 cytoplasm induced a host defense that inhibited TSWV NSm cell-to-cell movement.

265

266 **Nuclear Sw-5b confers host immunity to TSWV systemic infection**

267 To dissect the host immunity induced by the cytoplasmic and the nuclear Sw-5b, we  
268 generated transgenic *N. benthamiana* lines expressing YFP-Sw-5b, NES-YFP-Sw-5b,  
269 nes-YFP-Sw-5b, NLS-YFP-Sw-5b, and nls-YFP-Sw-5b, respectively (Table  
270 supplemental 1 and Table supplemental 2). After inoculation of these transgenic lines  
271 with TSWV-YN isolate, the EV (control) transgenic plants developed typical viral  
272 symptoms including stunt, leaf curl and mosaic at 7 to 15 days post inoculation (dpi).  
273 The NES-YFP-Sw-5b transgenic plants developed a strong HR trailing in the  
274 systemic leaves by 7 to 15 days post inoculation (dpi) (Figure 5A and Figure  
275 supplemental 4A), suggesting that NES-YFP-Sw-5b transgenic plant did not block  
276 TSWV systemic infection and caused virus infection-related systemic HR. In contrast,  
277 no systemic virus infection symptoms were observed in the YFP-Sw-5b and the  
278 nes-YFP-Sw-5b transgenic plants. The RT-PCR agreed with the symptom observation  
279 results and showed that TSWV-YN genomic RNA was accumulated in the systemic  
280 leaves of the TSWV-YN-inoculated NES-YFP-Sw-5b or the EV transgenic plants, but  
281 not in the systemic leaves of the TSWV-YN-inoculated YFP-Sw-5b or  
282 nes-YFP-Sw-5b transgenic plants (Figure 5C and Figure supplemental 4B). Also in  
283 this study, the TSWV-YN-inoculated NLS-YFP-Sw-5b or nls-YFP-Sw-5b transgenic  
284 plants did not show virus like symptoms in their systemic leaves by 7-15 dpi (Figure  
285 5A, and Figure supplemental 4A). The RT-PCR result confirmed that TSWV-YN  
286 genomic RNA had not accumulated in the systemic leaves of the NLS-YFP-Sw-5b or  
287 the nls-YFP-Sw-5b transgenic plants (Figure 5C, and Figure supplemental 4B),

288 indicating that the nuclear Sw-5b is responsible for the host immunity against TSWV  
289 systemic infection.

290

291 **Silencing *importin*  $\alpha 1$ ,  $\alpha 2$  and  $\beta$  expression abolished Sw-5b nucleus**  
292 **accumulation and host resistance to TSWV systemic infection**

293 *Importins* play important roles in translocating proteins from cytoplasm into nucleus  
294 (Chook and Blobel, 2001; Kanneganti et al., 2007). To determine the functions of  
295 *importin*  $\alpha 1$ ,  $\alpha 2$  and  $\beta$  in Sw-5b nucleus localization, we silenced *importin*  $\alpha 1$ ,  $\alpha 2$ ,  $\beta$ ,  
296  $\alpha 1$  and  $\alpha 2$ , and  $\alpha 1$  and  $\alpha 2$  and  $\beta$  expressions, respectively, in *N. benthamiana* leaves  
297 using a tobacco rattle virus (TRV)-based virus-induced gene silencing (VIGS) vector,  
298 and then transiently expressed YFP-Sw-5b in these plants. Analyses of these plants  
299 through RT-PCR using gene specific primers showed that silencing of these  
300 *importin* genes in *N. benthamiana* leaves was successful (Figure supplemental 5A).  
301 However, silencing individual *importin* gene or both *importin*  $\alpha 1$  and  $\alpha 2$  was not  
302 enough to block the nucleus accumulation of YFP-Sw-5b (Figure 6A). In contrast,  
303 after *importin*  $\alpha 1$ ,  $\alpha 2$  and  $\beta$  were all silenced through VIGS, the nucleus accumulation  
304 of YFP-Sw-5b was inhibited (Figure 6A, the middle image in the bottom panel).

305 To investigate the effects of nuclear import defected Sw-5b on host immunity to  
306 TSWV systemic infection, we silenced these *importin* genes in the Sw-5b transgenic  
307 *N. benthamiana* plants as described above, and then inoculated them with TSWV. The  
308 results showed that the plants silenced for *importin*  $\alpha 1$ ,  $\alpha 2$ , and  $\beta$  gene, individually,  
309 did not show TSWV systemic infection (Figure 6B and Figure supplemental 5B). In

310 addition, the transgenic plants silenced for both *importin  $\alpha 1$*  and  *$\alpha 2$*  genes also did not  
311 show TSWV systemic infection (Figure 6B and Figure supplemental 5B). In contrast,  
312 after silencing *importin  $\alpha 1$* ,  *$\alpha 2$*  and  *$\beta$*  together, the plants developed clear TSWV  
313 symptoms in systemic leaves followed by HR (Figure 6B, white arrow and Figure  
314 supplemental 5B), indicating that the nucleus accumulation of Sw-5b is indispensable  
315 for the induction of host immunity against TSWV systemic infection.

316

317 **The cytoplasmic and the nuclear Sw-5b act synergistically to confer a strong**  
318 **immunity to TSWV infection in *N. benthamiana***

319 To investigate whether cytoplasm-targeted and nucleus-targeted Sw-5b have joint  
320 effects on the defense against TSWV infection, we constructed a  $M_{(-)opt}$ -pSR $_{(+)}eGFP$   
321 vector by inserting a cassette expressing optimized TSWV M genomic sequence  
322 (Feng et al., 2020) into the pSR $_{(+)}eGFP$  mini-replicon to express NSm, N, and eGFP  
323 simultaneously in the same cells (Figure 7A). The construct  $M_{(-)opt}$ -pSR $_{(+)}eGFP$  couples  
324 the functions for both viral replication and viral cell-to-cell movement, mimicking the  
325 virus infection in plant leaves. After co-expressing this vector, the  $L_{(+)}opt$  and the EV in  
326 *N. benthamiana* leaves through agro-infiltration, the eGFP fluorescence was observed  
327 in many cells, due to the presence of the NSm movement protein and the RdRp $_{opt}$   
328 (Figure 7B, upper left image). When  $M_{(-)opt}$ -SR $_{(+)}eGFP$ ,  $L_{(-)opt}$  and Sw-5b were  
329 co-expressed in *N. benthamiana* leaves, the eGFP fluorescence was hardly detected  
330 and some were observed only in single leaf cells (Figure 7B upper right image, Figure  
331 supplemental 6A and B). When  $M_{(-)opt}$ -SR $_{(+)}eGFP$ ,  $L_{(+)}opt$  and NES-Sw-5b were

332 co-expressed in *N. benthamiana* leaves, the eGFP fluorescence was observed in  
333 clusters of a few cells (Figure 7B, Figure supplemental 6A), indicating that limited  
334 cell-to-cell movement had occurred in these leaves (Figure supplemental 6B). When  
335  $M_{(-)opt}$ -SR $_{(+)}eGFP$ ,  $L_{(+)}opt$  and NLS-Sw-5b were co-expressed in leaves, a few of eGFP  
336 fluorescence were detected but they were in single cells only. When leaves  
337 co-expressing  $M_{(-)opt}$ -SR $_{(+)}eGFP$ ,  $L_{(+)}opt$  and NES-Sw-5b + NLS-Sw-5b, the eGFP  
338 fluorescence was also hardly detected and some were observed only in single leaf  
339 cells. Western blot results showed that more eGFP had accumulated in the leaves  
340 co-expressing  $M_{(-)opt}$ -SR $_{(+)}eGFP$ ,  $L_{(+)}opt$ , and EV, followed by the leaves co-expressing  
341  $M_{(-)opt}$ -SR $_{(+)}eGFP$ ,  $L_{(+)}opt$ , and NLS-Sw-5b, and then the leaves co-expressing  
342  $M_{(-)opt}$ -SR $_{(+)}eGFP$ ,  $L_{(+)}opt$ , and NES-Sw-5b. Much less eGFP had accumulated in the  
343 leaves co-expressing  $M_{(-)opt}$ -SR $_{(+)}eGFP$ ,  $L_{(+)}opt$ , and NLS-Sw-5b + NES-Sw-5b, and in  
344 the leaves co-expressing  $M_{(-)opt}$ -SR $_{(+)}eGFP$ ,  $L_{(+)}opt$ , and Sw-5b (Figure 7C and D). The  
345 accumulation of eGFP was lower in the leaves co-expressing NES-Sw-5b +  
346 NLS-Sw-5b than that in the leaves co-expressing NES-Sw-5b or NLS-Sw-5b (Figure  
347 7C and D), indicating that NES-Sw-5b and NLS-Sw-5b have additive role in  
348 mediating host immunity against different TSWV infection steps.

349

350 **The ARC and LRR domain control Sw-5b cytoplasm localization whereas the SD**  
351 **domain controls its nucleus localization**

352 Sw-5b has an extended N-terminal SD domain, a CC domain, a NB-ARC domain, and  
353 a C-terminal LRR domain (Chen et al., 2016). To determine the roles of these



354 domains in Sw-5b subcellular localization, we produced vectors carrying individual  
355 domains fused with the YFP, and then expressed them individually in *N. benthamiana*  
356 leaves via agro-infiltration (Figure 8A). Under the confocal microscope, the YFP-SD,  
357 YFP-CC, and YFP-NB fusion were found in both cytoplasm and nucleus (Figure 8A  
358 and B). In contrast, the YFP-ARC and YFP-LRR fusion were found exclusively in the  
359 cytoplasm. In addition, the YFP-NB-ARC, YFP-CC-NB, and YFP-CC-NB-ARC  
360 fusion were found mostly in the cytoplasm. The YFP-NB-ARC-LRR (112 kDa)  
361 fusion accumulated exclusively in the cytoplasm, and the YFP-CC-NB-ARC-LRR  
362 fusion accumulated mainly in the cytoplasm (Figure 8A and B; Supplemental figure  
363 7). These results indicate that the CC and the NB domain are likely insufficient to  
364 traffic the fusions into the nucleus. Because the YFP-SD-CC fusion accumulated in  
365 both cytoplasm and nucleus, and the YFP-SD-CC-NB-ARC-LRR fusion accumulated  
366 in both cytoplasm and nucleus (Figure 8B). Based on these observations we consider  
367 that the ARC and the LRR domain are important for Sw-5b cytoplasm accumulation  
368 and the SD domain is important for Sw-5b nucleus accumulation.

369

## 370 **Discussion**

371 In this report, we provide evidence to show that the cytoplasm-accumulated and the  
372 nucleus-accumulated Sw-5b, a tomato immune receptor, play different roles in  
373 inducing host defense against tospovirus infection in plant. The cytoplasmic Sw-5b  
374 functions to induce a strong cell death response to inhibit TSWV replication. This  
375 host response is, however, insufficient to block virus intercellular and long-distance

376 movement. The nuclear-localized Sw-5b triggers a host defense that weakly inhibit  
377 viral replication but strongly inhibit tospovirus intercellular and systemic movement.  
378 The finding suggest that tomato Sw-5b NLR induces different type of resistances in  
379 cell compartment-specific manner to inhibit different tospovirus infection steps.  
380 Furthermore, the cytoplasmic and the nuclear Sw-5b act synergistically to confer a  
381 strong host immunity to TSWV infection in plant.

382 Through CLSM and fractionation analyses, we have now determined that Sw-5b  
383 accumulates in both cytoplasm and nucleus in *N. benthamiana* and tomato leaf cells.  
384 We have also determined that the forced cytoplasm accumulation of Sw-5b can  
385 induce a stronger cell death than that caused by the accumulation of Sw-5b in both  
386 cytoplasm and nucleus. While, the cell death induced by the forced nucleus  
387 accumulation of Sw-5b was significantly weakened. It was shown previously that the  
388 Sw-5b NB-ARC-LRR region can induce HR cell death in plant (Chen et al., 2016). In  
389 this study we showed that Sw-5b YFP-NB-ARC-LRR (112 kDa) accumulates in  
390 cytoplasm exclusively (Figure 9B). Barley MLA10 has been shown to accumulate in  
391 both cytoplasm and nucleus, and the forced cytoplasm accumulation of MLA10  
392 enhance cell death signaling, while the forced nucleus accumulation of MLA10  
393 inhibits its activity to induce cell death (Bai et al., 2012). Because both MLA10 and  
394 Sw-5b activity on cell death signaling are enhanced in the cytoplasm but suppressed  
395 in the nucleus, we speculate that, for both MLA10 and Sw-5b, the cytoplasm  
396 accumulation is crucial for the initiation and/or amplification of the cell death  
397 signaling. The CC and the TIR domain of several plant NLRs have been shown to

398 trigger cell death (Swiderski et al., 2009; Krasileva et al., 2010; Bernoux et al., 2011;  
399 Collier et al., 2011; Maekawa et al., 2011; Bai et al., 2012; Chen et al., 2017; Wang et  
400 al., 2020). Analyses of the three dimensional structures of Arabidopsis ZAR1  
401 resistosome have also shown that its CC domain can form pentamer structures that  
402 was able to target into host cell membranes, leading to ion leakage and cell death  
403 (Wang et al., 2019a; Wang et al., 2019b). Our finding together with recent findings  
404 from ZAR1 resistosome lead to a new direction in the future to investigate whether  
405 Sw-5b and other plant NLRs such as MLA10 target to host cytoplasmic membranes  
406 and which specific membranes to cause the cell death.

407

408       Successful virus infection in host plants involves virus replication followed by  
409 intercellular and long-distance movement (Lucas, 2006; Heinlein, 2015; Wang, 2015).  
410 In this study, we analyzed Sw-5b-mediated immunity against TSWV replication using  
411 a TSWV mini-replicon system and a movement defective NSm mutant. Our results  
412 showed that the forced cytoplasm accumulation of Sw-5b can induce a strong host  
413 defense against virus replication in cells. This finding implies that cytoplasm is one of  
414 the main source of defense signaling against TSWV replication. The defense signaling  
415 generated in nucleus can only induce a weak defense against TSWV replication.  
416 Therefore, the nuclear localized Sw-5b is only partially responsible for the induction  
417 of host defense against TSWV replication. It is also possible that this nuclear  
418 localized Sw-5b-induced weak host response is caused by a trace of NLS-YFP-Sw-5b  
419 maintained in the cytoplasm that maybe below the detection limit of Confocal

420 Microscope. Because cell death is associated with ROS burst, further investigations  
421 are needed to determine if the inhibition of virus replication is caused by the toxicity  
422 of ROS on viral replicase or other proteins associated with virus replication in cells.

423

424 Plant virus encodes specific movement protein(s) to traffic viral genome between  
425 cells and then leaves to cause systemic infection (Rao, 2002; Lucas, 2006; Taliansky  
426 et al., 2008). We reported previously that TSWV NSm alone can move between plant  
427 cells (Feng et al., 2016). In this study, we investigated the effect of the  
428 Sw-5b-mediated host defence on TSWV intercellular movement. Through this study,  
429 we have determined that after the recognition of NSm, Sw-5b receptor induced a  
430 strong reaction to block NSm intercellular trafficking. Previous reports have some  
431 indications on the role of plant NLRs in viral movement. Nevertheless it has no direct  
432 evidence showing that plant NLRs induce resistance against viral movement. Deom  
433 and colleagues had shown that the 9.4-kDa fluorescein isothiocyanate-labeled dextran  
434 was unable to move between cells in the transgenic tobacco *N* leaves expressing  
435 tobacco mosaic virus (TMV) movement protein at 24°C, an HR-permissive  
436 temperature (Deom et al., 1991). However, that study did not involve a TMV Avr  
437 protein. In a different report, TMV-GFP showed a limited cell-to-cell movement in  
438 leaves of tobacco cv. Sumsan NN at 33°C, an HR-nonpermissive temperature (Canto  
439 and Palukaitis, 2002). Li and colleagues found that after the treatment of  
440 SMV-inoculated Jidou 7 resistant plants with a callose synthase inhibitor, the plants  
441 showed enlarged HR lesions (Li et al., 2012). The soybean *Rsv3* induced extreme

442 resistance. However, after this extreme resistant soybean line was treated with a  
443 callose synthase inhibitor, the plants developed HR lesions upon SMV-G5H  
444 inoculation (Seo et al., 2014). These reports indicate that plant NLRs likely involves  
445 the defense against viral movement. Here we provide the direct evidence that Sw-5b  
446 NLR can induce a strong defense response to impede NSm intercellular trafficking.  
447 More importantly, we have determined that the induction of host immunity to TSWV  
448 intercellular movement requires the accumulation of Sw-5b in nucleus. Although the  
449 cytoplasmic Sw-5b can induce a strong cell death response, it cannot prevent TSWV  
450 NSm cell-to-cell movement. Consequently, we propose that nucleus is a key  
451 compartment to generate defense signaling to block TSWV cell-to-cell movement.

452 In this study, although the NES-YFP-Sw-5b transgenic *N. benthamiana* plants  
453 showed a HR trailing response upon TSWV infection, they were unable to stop  
454 TSWV systemic infection. Based on this finding, we conclude that HR cell death  
455 alone is not sufficient to block TSWV long-distance movement. In our study, the  
456 NLS-YFP-Sw-5b transgenic plants were resistant to TSWV systemic infection. After  
457 silencing the expressions of *importin  $\alpha 1$* ,  *$\alpha 2$*  and  *$\beta$*  simultaneously to inhibit the  
458 nucleus accumulation of Sw-5b, however, the resistance to TSWV systemic infection  
459 was abolished. These findings indicate that the Sw-5b-mediated resistance signaling  
460 against viral systemic infection is generated in nucleus. Some plant NLRs are known  
461 to interact with specific transcription factors in nucleus upon recognition of pathogen  
462 effectors (Cui et al., 2015; Kapos et al., 2019). The immune regulator EDS1 has also  
463 been shown to accumulate in nucleus to reprogram RNA transcription (Garcia et al.,

464 2010; Heidrich et al., 2011; Cui et al., 2015; Lapin et al., 2020). How Sw-5b regulates  
465 host immunity in nucleus requires further investigations.

466 Several plant immune receptors and immune regulators, including, e.g. potato Rx  
467 (Slootweg et al., 2010; Tameling et al., 2010), tobacco N (Burch-Smith et al., 2007;  
468 Caplan et al., 2008b), barley MLA10 (Shen et al., 2007), Arabidopsis RRS1-R/RPS4,  
469 and snc1 (Deslandes et al., 2003; Wirthmueller et al., 2007; Cheng et al., 2009), as  
470 well as Arabidopsis NPR1 (Katagiri and Tsuda, 2010), and EDS1 (Lapin et al., 2020)  
471 have been found to be nucleocytoplasmic. For some of them, nuclear accumulation of  
472 NLRs are required for the induction of plant immunity to pathogen attacks. Moreover,  
473 the MLA10-YFP-NES fusion was found to induce a strong cell death response, but  
474 not a strong host resistance to powdery mildew fungus infection. In contrast, the  
475 MLA10-YFP-NLS fusion inhibited its activity to induce a cell death response, but  
476 caused a host immunity to this pathogen (Bai et al., 2012). In many plant-pathogen  
477 interactions, cell death responses can be uncoupled from disease resistance  
478 (Bendahmane et al., 1999; Gassmann, 2005; Coll et al., 2010; Heidrich et al., 2011).  
479 This separation raises questions about how host resistance prevents pathogen invasion  
480 and what are the roles of cell death during pathogen infection. It is unclear whether  
481 the MLA10-YFP-NES-induced cell death has some inhibitory effects on powdery  
482 mildew fungus infection. In this study, we determined that cytoplasm- and  
483 nuclear-accumulation of Sw-5b have different functions. The cytoplasm-accumulated  
484 Sw-5b induces a strong defense against virus replication, whereas the  
485 nuclear-accumulated Sw-5b induced an inhibition of virus cell-to-cell and long

486 distance movement. Both cytoplasmic and nuclear Sw-5b are needed to confer a  
487 synergistic defense against tospovirus infection. We have also determined that Sw-5b  
488 NRC, LRR, and SD domains are important to regulate the proper subcellular  
489 localization of Sw-5b and the proper nucleoplasmic distribution of Sw-5b is needed to  
490 elicit full immune responses to inhibit different TSWV infection steps.

491

492 Based on the above results, we have created a working model for the Sw-5b  
493 NLR-induced host resistance against TSWV replication, and intercellular and  
494 long-distance movement in plant (Figure 9). Upon recognition of NSm in cytoplasm,  
495 Sw-5b switched from an autoinhibited state to an activated state. The activated Sw-5b  
496 accumulated in both the cytoplasm and the nucleus. The cytoplasm-accumulated and  
497 the nucleus-accumulated Sw-5b play different roles in inducing host immunity against  
498 TSWV infection. The cytoplasmic Sw-5b functions to induce a cell death response to  
499 inhibit TSWV replication, while the nuclear Sw-5b functions to induce a weak host  
500 defense against TSWV replication, but a strong defense against TSWV cell-to-cell  
501 and long-distance movement. The concerted defense signaling generated in the  
502 cytoplasm and nucleus resulted in a strong host resistance to tospovirus infection.

503

## 504 **Materials and Methods**

### 505 **Plasmid construction**

506 p2300S-YFP-Sw-5b was from a previously described source (Chen et al., 2016).

507 Different domains of Sw-5b were PCR-amplified from p2300S-Sw-5b (Chen et al.,

508 2016) and cloned individually behind the *YFP* gene in the p2300S vector using a  
509 two-step overlap PCR procedure as described (Li et al., 2019). All the primers used in  
510 this study are listed in Table supplemental 3.

511 To visualize the subcellular localization patterns of various fusion proteins, a  
512 SV40 T-Ag-derived nuclear localization signal (NLS, QPKKKRKVGG) (Lanford and  
513 Butel, 1984) or a PK1 nuclear export signal (NES, NELALKLAGLDINK) (Wen et al.,  
514 1995) was fused to the N-terminus of YFP-Sw-5b or the C-terminus of NSm-YFP, as  
515 described (Kong et al., 2017), to produce pNES-YFP-Sw-5b, pNLS-YFP-Sw-5b,  
516 pNSm-YFP-NES, and pNSm-YFP-NLS, respectively. In addition, YFP-Sw-5b and  
517 NSm-YFP were fused individually with a mutant NLS (nls, QPKKTRKVGG) or a  
518 mutant NES (nes, NELALKAAGADANK) to produce pnes-YFP-Sw-5b,  
519 pnls-YFP-Sw-5b, pNSm-YFP-nes, and pNSm-YFP-nls. The constructs were then  
520 transformed individually into *Agrobacterium tumefaciens* strain GV3101 cells.

521

## 522 **Transient gene expression, stable plant transformation, and virus inoculation**

523 *Nicotiana benthamiana* were grown in soil in pots inside a greenhouse maintained at  
524 25°C and a 16 h light/8 h dark photoperiod. Six-to-eight week-old *N. benthamiana*  
525 plants were used for various assays. Transient gene expression assays were performed  
526 in *N. benthamiana* leaves through agro-infiltration using *Agrobacterium* cultures  
527 carrying specific expressing constructs as described previously (Feng et al., 2016; Ma  
528 et al., 2017). Transgenic *N. benthamiana* lines expressing YFP-Sw-5b or its  
529 derivatives were made using constructs with a 35S promoter or a Sw-5b native



530 promoter via a standard leaf-disc transformation method (Chen et al., 2016). The  
531 resulting transgenic *N. benthamiana* lines were named as NES-YFP-Sw-5b,  
532 NLS-YFP-Sw-5b, nes-YFP-Sw-5b, nls-YFP-Sw-5b, YFP-Sw-5b, and EV  
533 (transformed with an empty vector), respectively. Inoculation of transgenic *N.*  
534 *benthamiana* plants with TSWV was done by rubbing plant leaves with TSWV-YN  
535 isolate-infected crude saps as described (Zhu et al., 2017). TRV-mediated VIGS in *N.*  
536 *benthamiana* plants was done as described (Ma et al., 2015). The agro-infiltrated or  
537 the virus-inoculated plants were grown inside a growth chamber maintained at 25/23  
538 °C (day/night) with a 16/8 h light and dark photoperiod.

539

#### 540 **Particle bombardment**

541 The particle bombardment is described (Feng et al., 2016). Briefly, 60 mg Tungsten  
542 M-10 microcarrier (Bio-RAD) was placed into a 1.5 ml Eppendorf tube with 1 mL  
543 70% ethanol. The tube was vortexed for 3 minutes, and then stood at room  
544 temperature for 15 minutes. After centrifuge at low speed for 5 seconds, the  
545 supernatant was removed and the pellet was rinsed with 70% ethanol for 3 times. One  
546 mL 50% sterile glycerol solution was added and divided Tungsten M-10 microcarrier  
547 into 50 µl. Five µg pRTL2-YFP, pRTL2-YFP-Sw-5b or pRTL2-YFP-Sw-5bD857V  
548 plasmid DNA, 50 µl of 2.5 M CaCl<sub>2</sub>, and 20 µl of 0.1 M spermidine, respectively  
549 were added and mixed with microcarrier. After centrifuge at low speed for 5 seconds  
550 and the supernatant removed. The pellet was resuspended in 200 µl 70% ethanol and  
551 centrifugation as described above. Use 48 µl of 100% ethanol to resuspend the

552 tungsten particle::plasmid DNA complexes, and load 15 48  $\mu$ l mixture onto the center  
553 of carrier (Bio-RAD), air dry, and use He/1000 particle transport system (BIO-RAD)  
554 to bombard tomato leaves harvested from 3- or 4-week-old of Money Marker. The  
555 bombarded leaves were incubated in Petri dishes for 24 hours at 25°C followed with  
556 Confocal Microscope analysis.

557

### 558 **Trypan blue staining**

559 *N. benthamiana* leaves were harvested at 3 days post agro-infiltration (dpai) and  
560 boiled for 5 min in a 1.15:1 (v/v) mixed ethanol and trypan blue staining solution (10  
561 g phenol, 10 mL glycerol, 10 mL lactic acid, and 20 mg trypan blue in 10 mL distilled  
562 water). The stained leaves were then de-stained in a chloral hydrate solution (2.5 g per  
563 mL distilled water) as described (Bai et al., 2012).

564

### 565 **Electrolyte leakage assay**

566 Electrolyte leakage assay was performed as previously described (Mittler et al., 1999;  
567 Zhu et al., 2017) with slight modifications. Briefly, five leaf discs (9 mm in diameter  
568 each) were taken from the agro-infiltrated leaves per treatment and at various dpai.  
569 The harvested leaf discs from a specific treatment were floated on a 10 mL distilled  
570 water for 3 h at room temperature (RT), and the conductivity of each bathing water  
571 was measured (referred to as value A) using a Multiparameter Meter as instructed  
572 (Mettler Toledo, Zurich, Switzerland). After the first measurement, the leaf discs were  
573 returned to the bathing water and incubated at 95°C for 25 min. After cooling down to

574 RT, the conductivity of each bathing sample was measured again (referred to as value  
575 B). The ion leakage was expressed as the ratio determined by value A/value B  $\times$  100.  
576 The mean value and standard error of each treatment were calculated using the data  
577 from three biological replicates per treatment at each sampling time point.

578

### 579 **Confocal laser scanning microscopy**

580 Tissue samples were collected from the leaves transiently expressing YFP-Sw-5b or  
581 one of the fusion proteins at 24–36 hours post agro-infiltration (h<sub>pai</sub>). The collected  
582 tissue samples were mounted in water between a glass slide and a coverslip. Images  
583 of individual samples were captured under a Carl Zeiss LSM 710 confocal laser  
584 scanning microscope. YFP fusions were excited at 488 nm and the emission was  
585 captured at 497–520 nm. The resulting images were further processed using the Zeiss  
586 710 CLSM software followed by the Adobe Photoshop software (San Jose, CA,  
587 USA).

588

### 589 **Nucleus and cytoplasm fractionations**

590 *N. benthamiana* leaf tissues (1 g per sample), representing a specific treatment, were  
591 collected at 24 h<sub>pai</sub>, frozen in liquid nitrogen, ground to fine powders, and then  
592 homogenized in 2 mL (per sample) extraction buffer 1 (20 mM Tris-HCl, pH 7.5, 20  
593 mM KCl, 2.5 mM MgCl<sub>2</sub>, 2 mM EDTA, 25% glycerol, 250 mM sucrose, 1 $\times$ Protease  
594 Inhibitor Cocktail, and 5 mM DTT). The resulting lysate was filtered through 30  $\mu$ m  
595 filters to remove debris, and the filtrate was centrifuged at 2,000  $\times$  g for 5 minutes to

596 pellet nuclei. The supernatant from a sample was transferred into a new tube and  
597 centrifuged at  $10,000 \times g$  for 10 min. The resulting supernatant was used as the  
598 cytoplasm fraction. The nuclei containing pellet was resuspended in 5 mL extraction  
599 buffer 2 (20 mM Tris-HCl, pH 7.4, 25% glycerol, 2.5 mM MgCl<sub>2</sub>, and 0.2% Triton  
600 X-100), centrifuged for 10 min at  $2,000 \times g$  followed by 4-6 cycles of resuspension  
601 and centrifugation as described above. The resulting pellet was resuspended again in  
602 500  $\mu$ L extraction buffer 3 (20 mM Tris-HCl, pH 7.5, 0.25 M sucrose, 10 mM MgCl<sub>2</sub>,  
603 0.5% Triton X-100, and 5 mM  $\beta$ -mercaptoethanol). The nuclei fraction was carefully  
604 layered on the top of 500 mL extraction buffer 4 (20 mM Tris-HCl, pH 7.5, 1.7 M  
605 sucrose, 10 mM MgCl<sub>2</sub>, 0.5% Triton X-100, 1 $\times$ Protease Inhibitor Cocktail, and 5 mM  
606  $\beta$ -mercaptoethanol), and then centrifuged at  $16,000 \times g$  for 1 h. The resulting pellet  
607 was resuspended in 500  $\mu$ L extraction buffer 1 and stored at  $-80^{\circ}\text{C}$  until use or used  
608 immediately for SDS-PAGE assays. All the processes were performed on ice or at  $4^{\circ}\text{C}$ .  
609 In this study, actin and histone H3 were used as the cytoplasmic and the nuclear  
610 markers, respectively.

611

### 612 **Western blot and co-immunoprecipitation assays**

613 Western blot and co-immunoprecipitation assays were performed as described (Zhu et  
614 al., 2017). Briefly, agro-infiltrated leaf samples (1 g per sample) were harvested and  
615 homogenized individually in pre-chilled mortars with pestles in 2 mL extraction  
616 buffer [10% (v/v) glycerol, 25 mM Tris, pH 7.5, 1 mM EDTA, 150 mM NaCl, 10 mM  
617 DTT, 2% (w/v) polyvinylpyrrolidone, and 1 $\times$  protease inhibitor cocktail (Sigma,

618 Shanghai, China)]. Each crude slurry was transferred into a 2 mL Eppendorf tube, and  
619 spun for 2 min at full speed in a refrigerated microcentrifuge. The supernatant was  
620 transferred into a clean 1.5 mL Eppendorf tube and spun for 10 min at 4°C. For  
621 Western blot assays, 50 µL supernatant from a sample was mixed with 150 µL  
622 Laemmli buffer, boiled for 5 min, and analyzed in SDS-PAGE gels through  
623 electrophoresis. For immunoprecipitation assays, 1 mL supernatant was mixed with  
624 25 µL GFP-trap agarose beads (ChromoTek, Planegg-Martinsried, Germany),  
625 incubated for 2 h at 4°C on an orbital shaker, and then pelleted through low speed  
626 centrifugation. The blots were probed with a 1:2,500 (v/v) diluted anti-YFP antibody  
627 or other specific antibodies followed a 1:10,000 (v/v) diluted horseradish peroxidase  
628 (HRP)-conjugated goat anti-rabbit or a goat anti-mouse antibody (Sigma-Aldrich, St.  
629 Louis, MO, USA). The detection signal was developed using the ECL substrate kit as  
630 instructed (Thermo Scientific, Hudson, NH, USA).

631

### 632 **RT-PCR detection of TSWV infection**

633 Total RNA was extracted from TSWV-inoculated *N. benthamiana* plant leaves using  
634 an RNA Purification Kit (Tiangen Biotech, Beijing, China), and then treated with  
635 RNase-free DNase I (TaKaRa, Dalian, China). First-strand cDNA was synthesized  
636 using a TSWV-specific primer (Supplementary Table 4). PCR reactions were as  
637 follows: initial denaturation at 94°C for 2 min followed by 35 cycles of 94°C for 30 s,  
638 52°C for 30 s, and 72°C for 1 min. The final extension was 72°C for 10 min. The  
639 resulting PCR products were visualized in 1.0% (w/v) agarose gels through

640 electrophoresis.

641

#### 642 **Acknowledgments**

643 This work was supported by the National Natural Science Foundation of China  
644 (31630062, 31925032 and 31870143), the Fundamental Research Funds for the  
645 Central Universities (JCQY201904 and KYXK202012), Youth Science and  
646 Technology Innovation Program to XT.

647

#### 648 **Author contributions**

649 Hongyu Chen, Xin Qian and Xiaojiao Chen, Data curation, Formal analysis,  
650 Validation, Methodology, Writing - original draft, Writing - review and editing;  
651 Tongqing Yang, Mingfeng Feng, Jing Chen, Ruixiang Cheng, Hao Hong, Ying Zheng,  
652 Yuzhen Mei, Danyu Shen, Yi Xu, Min Zhu Data curation, Methodology; Xin Shun  
653 Ding, Methodology, Writing - review and editing; Xiaorong Tao, Investigation,  
654 Writing - original draft, Writing - review and editing.

655

#### 656 **Competing interests:**

657 The authors declare that no competing interests exist.

658

#### 659 **Data availability**

660 All data produced in this study are presented in this manuscript or as the supporting  
661 files

662 **References**

- 663 **Axtell, M.J., and Staskawicz, B.J.** (2003). Initiation of RPS2-specified disease resistance in  
664 Arabidopsis is coupled to the AvrRpt2-directed elimination of RIN4. *Cell* **112**, 369-377.
- 665 **Bai, S., Liu, J., Chang, C., Zhang, L., Maekawa, T., Wang, Q., Xiao, W., Liu, Y., Chai, J.,**  
666 **Takken, F.L., Schulze-Lefert, P., and Shen, Q.H.** (2012). Structure-function analysis of  
667 barley NLR immune receptor MLA10 reveals its cell compartment specific activity in cell  
668 death and disease resistance. *PLoS Pathog* **8**, e1002752.
- 669 **Bendahmane, A., Kanyuka, K., and Baulcombe, D.C.** (1999). The Rx gene from potato controls  
670 separate virus resistance and cell death responses. *Plant Cell* **11**, 781-792.
- 671 **Bernoux, M., Ve, T., Williams, S., Warren, C., Hatters, D., Valkov, E., Zhang, X., Ellis, J.G.,**  
672 **Kobe, B., and Dodds, P.N.** (2011). Structural and functional analysis of a plant resistance  
673 protein TIR domain reveals interfaces for self-association, signaling, and autoregulation. *Cell*  
674 *Host Microbe* **9**, 200-211.
- 675 **Brommonschenkel, S.H., Frary, A., Frary, A., and Tanksley, S.D.** (2000). The broad-spectrum  
676 tospovirus resistance gene Sw-5 of tomato is a homolog of the root-knot nematode resistance  
677 gene Mi. *Mol Plant Microbe Interact* **13**, 1130-1138.
- 678 **Burch-Smith, T.M., Schiff, M., Caplan, J.L., Tsao, J., Czymmek, K., and Dinesh-Kumar, S.P.**  
679 (2007). A novel role for the TIR domain in association with pathogen-derived elicitors. *PLoS*  
680 *Biol* **5**, e68.
- 681 **Canto, T., and Palukaitis, P.** (2002). Novel N gene-associated, temperature-independent resistance to  
682 the movement of tobacco mosaic virus vectors neutralized by a cucumber mosaic virus RNA1  
683 transgene. *J Virol* **76**, 12908-12916.
- 684 **Caplan, J., Padmanabhan, M., and Dinesh-Kumar, S.P.** (2008a). Plant NB-LRR Immune  
685 Receptors: From Recognition to Transcriptional Reprogramming. *Cell host & microbe* **3**,  
686 126-135.
- 687 **Caplan, J.L., Mamillapalli, P., Burch-Smith, T.M., Czymmek, K., and Dinesh-Kumar, S.P.**  
688 (2008b). Chloroplastic protein NRIP1 mediates innate immune receptor recognition of a viral  
689 effector. *Cell* **132**, 449-462.
- 690 **Cesari, S., Moore, J., Chen, C., Webb, D., Periyannan, S., Mago, R., Bernoux, M., Lagudah, E.S.,**  
691 **and Dodds, P.N.** (2016). Cytosolic activation of cell death and stem rust resistance by cereal  
692 MLA-family CC-NLR proteins. *Proc Natl Acad Sci U S A* **113**, 10204-10209.
- 693 **Chen, T., Liu, D., Niu, X., Wang, J., Qian, L., Han, L., Liu, N., Zhao, J., Hong, Y., and Liu, Y.**  
694 (2017). Antiviral Resistance Protein Tm-2(2) Functions on the Plasma Membrane. *Plant*  
695 *Physiol* **173**, 2399-2410.
- 696 **Chen, X., Zhu, M., Jiang, L., Zhao, W., Li, J., Wu, J., Li, C., Bai, B., Lu, G., Chen, H., Moffett,**  
697 **P., and Tao, X.** (2016). A multilayered regulatory mechanism for the autoinhibition and  
698 activation of a plant CC-NB-LRR resistance protein with an extra N-terminal domain. *New*  
699 *Phytol* **212**, 161-175.
- 700 **Cheng, Y.T., Germain, H., Wiermer, M., Bi, D., Xu, F., Garcia, A.V., Wirthmueller, L., Despres,**  
701 **C., Parker, J.E., Zhang, Y., and Li, X.** (2009). Nuclear pore complex component  
702 MOS7/Nup88 is required for innate immunity and nuclear accumulation of defense regulators  
703 in Arabidopsis. *Plant Cell* **21**, 2503-2516.

- 704 **Chook, Y.M., and Blobel, G.** (2001). Karyopherins and nuclear import. *Current opinion in structural*  
705 *biology* **11**, 703-715.
- 706 **Coll, N.S., Vercammen, D., Smidler, A., Clover, C., Van Breusegem, F., Dangl, J.L., and Epple, P.**  
707 (2010). Arabidopsis type I metacaspases control cell death. *Science* **330**, 1393-1397.
- 708 **Collier, S.M., and Moffett, P.** (2009). NB-LRRs work a "bait and switch" on pathogens. *Trends Plant*  
709 *Sci* **14**, 521-529.
- 710 **Collier, S.M., Hamel, L.P., and Moffett, P.** (2011). Cell death mediated by the N-terminal domains of  
711 a unique and highly conserved class of NB-LRR protein. *Mol Plant Microbe Interact* **24**,  
712 918-931.
- 713 **Cui, H., Tsuda, K., and Parker, J.E.** (2015). Effector-triggered immunity: from pathogen perception  
714 to robust defense. *Annu Rev Plant Biol* **66**, 487-511.
- 715 **De Oliveira, A.S., Koolhaas, I., Boiteux, L.S., Caldararu, O.F., Petrescu, A.J., Oliveira Resende,**  
716 **R., and Kormelink, R.** (2016). Cell death triggering and effector recognition by Sw-5  
717 SD-CNL proteins from resistant and susceptible tomato isolines to Tomato spotted wilt virus.  
718 *Mol Plant Pathol* **17**, 1442-1454.
- 719 **Deom, C.M., Wolf, S., Holt, C.A., Lucas, W.J., and Beachy, R.N.** (1991). Altered function of the  
720 tobacco mosaic virus movement protein in a hypersensitive host. *Virology* **180**, 251-256.
- 721 **Deslandes, L., Olivier, J., Peeters, N., Feng, D.X., Khounlotham, M., Boucher, C., Somssich, I.,**  
722 **Genin, S., and Marco, Y.** (2003). Physical interaction between RRS1-R, a protein conferring  
723 resistance to bacterial wilt, and PopP2, a type III effector targeted to the plant nucleus. *Proc*  
724 *Natl Acad Sci U S A* **100**, 8024-8029.
- 725 **Dodds, P.N., and Rathjen, J.P.** (2010). Plant immunity: towards an integrated view of plant-pathogen  
726 interactions. *Nat Rev Genet* **11**, 539-548.
- 727 **Ea, V.D.B., and Jones, J.D.** (1998). Plant disease-resistance proteins and the gene-for-gene concept.  
728 *Trends in Biochemical Sciences* **23**, 454-456(453).
- 729 **Engelhardt, S., Boevink, P.C., Armstrong, M.R., Ramos, M.B., Hein, I., and Birch, P.R.** (2012).  
730 Relocalization of late blight resistance protein R3a to endosomal compartments is associated  
731 with effector recognition and required for the immune response. *Plant Cell* **24**, 5142-5158.
- 732 **Ernst, K., Kumar, A., Kriseleit, D., Kloos, D.U., Phillips, M.S., and Ganai, M.W.** (2002). The  
733 broad-spectrum potato cyst nematode resistance gene (Hero) from tomato is the only member  
734 of a large gene family of NBS-LRR genes with an unusual amino acid repeat in the LRR  
735 region. *Plant J* **31**, 127-136.
- 736 **Feng, M., Cheng, R., Chen, M., Guo, R., Li, L., Feng, Z., Wu, J., Xie, L., Hong, J., Zhang, Z.,**  
737 **Kormelink, R., and Tao, X.** (2020). Rescue of tomato spotted wilt virus entirely from  
738 complementary DNA clones. *Proc Natl Acad Sci U S A* **117**, 1181-1190.
- 739 **Feng, Z., Xue, F., Xu, M., Chen, X., Zhao, W., Garcia-Murria, M.J., Mingarro, I., Liu, Y.,**  
740 **Huang, Y., Jiang, L., Zhu, M., and Tao, X.** (2016). The ER-Membrane Transport System Is  
741 Critical for Intercellular Trafficking of the NSm Movement Protein and Tomato Spotted Wilt  
742 *Tospovirus*. *PLoS Pathog* **12**, e1005443.
- 743 **Gao, Z., Chung, E.H., Eitas, T.K., and Dangl, J.L.** (2011). Plant intracellular innate immune receptor  
744 Resistance to *Pseudomonas syringae* pv. *maculicola* 1 (RPM1) is activated at, and functions  
745 on, the plasma membrane. *Proc Natl Acad Sci U S A* **108**, 7619-7624.
- 746 **Garcia, A.V., Blanvillain-Baufume, S., Huibers, R.P., Wiermer, M., Li, G., Gobbato, E., Rietz, S.,**  
747 **and Parker, J.E.** (2010). Balanced nuclear and cytoplasmic activities of EDS1 are required



- 748 for a complete plant innate immune response. *PLoS Pathog* **6**, e1000970.
- 749 **Gassmann, W.** (2005). Natural variation in the Arabidopsis response to the avirulence gene hopPsyA  
750 uncouples the hypersensitive response from disease resistance. *Mol Plant Microbe Interact* **18**,  
751 1054-1060.
- 752 **Hallwass, M., de Oliveira, A.S., de Campos Dianese, E., Lohuis, D., Boiteux, L.S., Inoue-Nagata,**  
753 **A.K., Resende, R.O., and Kormelink, R.** (2014). The Tomato spotted wilt virus cell-to-cell  
754 movement protein (NSM ) triggers a hypersensitive response in Sw-5-containing resistant  
755 tomato lines and in *Nicotiana benthamiana* transformed with the functional Sw-5b resistance  
756 gene copy. *Mol Plant Pathol* **15**, 871-880.
- 757 **Heidrich, K., Wirthmueller, L., Tasset, C., Pouzet, C., Deslandes, L., and Parker, J.E.** (2011).  
758 Arabidopsis EDS1 connects pathogen effector recognition to cell compartment-specific  
759 immune responses. *Science* **334**, 1401-1404.
- 760 **Heinlein, M.** (2015). Plant virus replication and movement. *Virology* **479-480**, 657-671.
- 761 **Horsefield, S., Burdett, H., Zhang, X., Manik, M.K., Shi, Y., Chen, J., Qi, T., Gilley, J., Lai, J.S.,**  
762 **Rank, M.X., Casey, L.W., Gu, W., Ericsson, D.J., Foley, G., Hughes, R.O., Bosanac, T.,**  
763 **von Itzstein, M., Rathjen, J.P., Nanson, J.D., Boden, M., Dry, I.B., Williams, S.J.,**  
764 **Staskawicz, B.J., Coleman, M.P., Ve, T., Dodds, P.N., and Kobe, B.** (2019). NAD(+)   
765 cleavage activity by animal and plant TIR domains in cell death pathways. *Science* **365**,  
766 793-799.
- 767 **Inoue, H., Hayashi, N., Matsushita, A., Xinqiong, L., Nakayama, A., Sugano, S., Jiang, C.J., and**  
768 **Takatsuji, H.** (2013). Blast resistance of CC-NB-LRR protein Pb1 is mediated by WRKY45  
769 through protein-protein interaction. *Proc Natl Acad Sci U S A* **110**, 9577-9582.
- 770 **Jones, J.D., Vance, R.E., and Dangl, J.L.** (2016). Intracellular innate immune surveillance devices in  
771 plants and animals. *Science* **354**.
- 772 **Jubic, L.M., Saile, S., Furzer, O.J., El Kasm, F., and Dangl, J.L.** (2019). Help wanted: helper  
773 NLRs and plant immune responses. *Curr Opin Plant Biol* **50**, 82-94.
- 774 **Kanneganti, T.D., Bai, X., Tsai, C.W., Win, J., Meulia, T., Goodin, M., Kamoun, S., and**  
775 **Hogenhout, S.A.** (2007). A functional genetic assay for nuclear trafficking in plants. *Plant J*  
776 **50**, 149-158.
- 777 **Kapos, P., Devendrakumar, K.T., and Li, X.** (2019). Plant NLRs: From discovery to application.  
778 *Plant Sci* **279**, 3-18.
- 779 **Katagiri, F., and Tsuda, K.** (2010). Understanding the plant immune system. *Mol Plant Microbe*  
780 *Interact* **23**, 1531-1536.
- 781 **Kawano, Y., Fujiwara, T., Yao, A., Housen, Y., Hayashi, K., and Shimamoto, K.** (2014).  
782 Palmitoylation-dependent membrane localization of the rice resistance protein pit is critical  
783 for the activation of the small GTPase OsRac1. *J Biol Chem* **289**, 19079-19088.
- 784 **Kong, L., Qiu, X., Kang, J., Wang, Y., Chen, H., Huang, J., Qiu, M., Zhao, Y., Kong, G., Ma, Z.,**  
785 **Wang, Y., Ye, W., Dong, S., Ma, W., and Wang, Y.** (2017). A *Phytophthora* Effector  
786 Manipulates Host Histone Acetylation and Reprograms Defense Gene Expression to Promote  
787 Infection. *Curr Biol* **27**, 981-991.
- 788 **Kormelink, R., Storms, M., Van Lent, J., Peters, D., and Goldbach, R.** (1994). Expression and  
789 subcellular location of the NSM protein of tomato spotted wilt virus (TSWV), a putative viral  
790 movement protein. *Virology* **200**, 56-65.
- 791 **Kormelink, R., Garcia, M.L., Goodin, M., Sasaya, T., and Haenni, A.L.** (2011). Negative-strand

- 792 RNA viruses: the plant-infecting counterparts. *Virus research* **162**, 184-202.
- 793 **Kourelis, J., and van der Hoorn, R.A.L.** (2018). Defended to the Nines: 25 Years of Resistance Gene  
794 Cloning Identifies Nine Mechanisms for R Protein Function. *Plant Cell* **30**, 285-299.
- 795 **Krasileva, K.V., Dahlbeck, D., and Staskawicz, B.J.** (2010). Activation of an Arabidopsis resistance  
796 protein is specified by the in planta association of its leucine-rich repeat domain with the  
797 cognate oomycete effector. *Plant Cell* **22**, 2444-2458.
- 798 **Lanford, R.E., and Butel, J.S.** (1984). Construction and characterization of an SV40 mutant defective  
799 in nuclear transport of T antigen. *Cell* **37**, 801-813.
- 800 **Lapin, D., Bhandari, D.D., and Parker, J.E.** (2020). Origins and Immunity Networking Functions of  
801 EDS1 Family Proteins. *Annu Rev Phytopathol* **58**, 253-276.
- 802 **Leastro, M.O., Pallas, V., Resende, R.O., and Sanchez-Navarro, J.A.** (2017). The functional  
803 analysis of distinct tospovirus movement proteins (NSM) reveals different capabilities in  
804 tubule formation, cell-to-cell and systemic virus movement among the tospovirus species.  
805 *Virus research* **227**, 57-68.
- 806 **Li, J., Huang, H., Zhu, M., Huang, S., Zhang, W., Dinesh-Kumar, S.P., and Tao, X.** (2019). A  
807 Plant Immune Receptor Adopts a Two-Step Recognition Mechanism to Enhance Viral  
808 Effector Perception. *Mol Plant* **12**, 248-262.
- 809 **Li, W., Zhao, Y., Liu, C., Yao, G., Wu, S., Hou, C., Zhang, M., and Wang, D.** (2012). Callose  
810 deposition at plasmodesmata is a critical factor in restricting the cell-to-cell movement of  
811 Soybean mosaic virus. *Plant cell reports* **31**, 905-916.
- 812 **Li, X., Kapos, P., and Zhang, Y.** (2015). NLRs in plants. *Curr Opin Immunol* **32**, 114-121.
- 813 **Lopez, C., Aramburu, J., Galipienso, L., Soler, S., Nuez, F., and Rubio, L.** (2011). Evolutionary  
814 analysis of tomato Sw-5 resistance-breaking isolates of Tomato spotted wilt virus. *J Gen Virol*  
815 **92**, 210-215.
- 816 **Lucas, W.J.** (2006). Plant viral movement proteins: agents for cell-to-cell trafficking of viral genomes.  
817 *Virology* **344**, 169-184.
- 818 **Lukasik-Shreepathy, E., Slotweg, E., Richter, H., Goverse, A., Cornelissen, B.J., and Takken,**  
819 **F.L.** (2012). Dual regulatory roles of the extended N terminus for activation of the tomato  
820 MI-1.2 resistance protein. *Mol Plant Microbe Interact* **25**, 1045-1057.
- 821 **Ma, S., Lapin, D., Liu, L., Sun, Y., Song, W., Zhang, X., Logemann, E., Yu, D., Wang, J.,**  
822 **Jirschitzka, J., Han, Z., Schulze-Lefert, P., Parker, J.E., and Chai, J.** (2020). Direct  
823 pathogen-induced assembly of an NLR immune receptor complex to form a holoenzyme.  
824 *Science* **370**.
- 825 **Ma, Y., Guo, H., Hu, L., Martinez, P.P., Moschou, P.N., Cevik, V., Ding, P., Duxbury, Z., Sarris,**  
826 **P.F., and Jones, J.D.G.** (2018). Distinct modes of derepression of an Arabidopsis immune  
827 receptor complex by two different bacterial effectors. *Proceedings of the National Academy of*  
828 *Sciences of the United States of America* **115**, 10218-10227.
- 829 **Ma, Z., Song, T., Zhu, L., Ye, W., Wang, Y., Shao, Y., Dong, S., Zhang, Z., Dou, D., Zheng, X.,**  
830 **Tyler, B.M., and Wang, Y.** (2015). A *Phytophthora sojae* Glycoside Hydrolase 12 Protein Is  
831 a Major Virulence Factor during Soybean Infection and Is Recognized as a PAMP. *Plant Cell*  
832 **27**, 2057-2072.
- 833 **Ma, Z., Zhu, L., Song, T., Wang, Y., Zhang, Q., Xia, Y., Qiu, M., Lin, Y., Li, H., Kong, L., Fang,**  
834 **Y., Ye, W., Wang, Y., Dong, S., Zheng, X., Tyler, B.M., and Wang, Y.** (2017). A  
835 paralogous decoy protects *Phytophthora sojae* apoplastic effector PsXEG1 from a host

- 836 inhibitor. *Science* **355**, 710-714.
- 837 **Maekawa, T., Cheng, W., Spiridon, L.N., Toller, A., Lukasik, E., Saijo, Y., Liu, P., Shen, Q.H.,**  
838 **Micluta, M.A., Somssich, I.E., Takken, F.L.W., Petrescu, A.J., Chai, J., and**  
839 **Schulze-Lefert, P.** (2011). Coiled-coil domain-dependent homodimerization of intracellular  
840 barley immune receptors defines a minimal functional module for triggering cell death. *Cell*  
841 *Host Microbe* **9**, 187-199.
- 842 **Meier, N., Hatch, C., Nagalakshmi, U., and Dinesh-Kumar, S.P.** (2019). Perspectives on  
843 intracellular perception of plant viruses. *Mol Plant Pathol* **20**, 1185-1190.
- 844 **Meyers, B.C., Kozik, A., Griego, A., Kuang, H., and Michelmore, R.W.** (2003). Genome-wide  
845 analysis of NBS-LRR-encoding genes in Arabidopsis. *Plant Cell* **15**, 809-834.
- 846 **Milligan, S.B., Bodeau, J., Yaghoobi, J., Kaloshian, I., Zabel, P., and Williamson, V.M.** (1998).  
847 The root knot nematode resistance gene Mi from tomato is a member of the leucine zipper,  
848 nucleotide binding, leucine-rich repeat family of plant genes. *Plant Cell* **10**, 1307-1319.
- 849 **Mittler, R., Herr, E.H., Orvar, B.L., van Camp, W., Willekens, H., Inze, D., and Ellis, B.E.**  
850 (1999). Transgenic tobacco plants with reduced capability to detoxify reactive oxygen  
851 intermediates are hyperresponsive to pathogen infection. *Proc Natl Acad Sci U S A* **96**,  
852 14165-14170.
- 853 **Oliver, J.E., and Whitfield, A.E.** (2016). The Genus *Tospovirus*: Emerging Bunyaviruses that  
854 Threaten Food Security. *Annual review of virology* **3**, 101-124.
- 855 **Padmanabhan, M.S., Ma, S., Burch-Smith, T.M., Czymbek, K., Huijser, P., and Dinesh-Kumar,**  
856 **S.P.** (2013). Novel positive regulatory role for the SPL6 transcription factor in the N  
857 TIR-NB-LRR receptor-mediated plant innate immunity. *PLoS Pathog* **9**, e1003235.
- 858 **Peiro, A., Canizares, M.C., Rubio, L., Lopez, C., Moriones, E., Aramburu, J., and**  
859 **Sanchez-Navarro, J.** (2014). The movement protein (NSm) of Tomato spotted wilt virus is  
860 the avirulence determinant in the tomato Sw-5 gene-based resistance. *Mol Plant Pathol* **15**,  
861 802-813.
- 862 **Qi, D., and Innes, R.W.** (2013). Recent Advances in Plant NLR Structure, Function, Localization, and  
863 Signaling. *Front Immunol* **4**, 348.
- 864 **Qi, D., DeYoung, B.J., and Innes, R.W.** (2012). Structure-function analysis of the coiled-coil and  
865 leucine-rich repeat domains of the RPS5 disease resistance protein. *Plant Physiol* **158**,  
866 1819-1832.
- 867 **Rao, A.L.N.C., Y. G , Khan, J. A , Dijkstra, J.** (2002). Molecular biology of plant virus movement.  
868 *Plant Viruses As Molecular Pathogens*.
- 869 **Scholthof, K.B., Adkins, S., Czosnek, H., Palukaitis, P., Jacquot, E., Hohn, T., Hohn, B.,**  
870 **Saunders, K., Candresse, T., Ahlquist, P., Hemenway, C., and Foster, G.D.** (2011). Top  
871 10 plant viruses in molecular plant pathology. *Mol Plant Pathol* **12**, 938-954.
- 872 **Seo, J.K., Kwon, S.J., Cho, W.K., Choi, H.S., and Kim, K.H.** (2014). Type 2C protein phosphatase  
873 is a key regulator of antiviral extreme resistance limiting virus spread. *Scientific reports* **4**,  
874 5905.
- 875 **Seong, K., Seo, E., Witek, K., Li, M., and Staskawicz, B.** (2020). Evolution of NLR resistance genes  
876 with noncanonical N-terminal domains in wild tomato species. *New Phytol* **227**, 1530-1543.
- 877 **Shen, Q.H., Saijo, Y., Mauch, S., Biskup, C., Bieri, S., Keller, B., Seki, H., Ulker, B., Somssich,**  
878 **I.E., and Schulze-Lefert, P.** (2007). Nuclear activity of MLA immune receptors links

- 879 isolate-specific and basal disease-resistance responses. *Science* **315**, 1098-1103.
- 880 **Slootweg, E., Roosien, J., Spiridon, L.N., Petrescu, A.J., Tameling, W., Joosten, M., Pomp, R.,**  
881 **van Schaik, C., Dees, R., Borst, J.W., Smant, G., Schots, A., Bakker, J., and Goverse, A.**  
882 (2010). Nucleocytoplasmic distribution is required for activation of resistance by the potato  
883 NB-LRR receptor Rx1 and is balanced by its functional domains. *Plant Cell* **22**, 4195-4215.
- 884 **Soosaar, J.L., Burch-Smith, T.M., and Dinesh-Kumar, S.P.** (2005). Mechanisms of plant resistance  
885 to viruses. *Nat Rev Microbiol* **3**, 789-798.
- 886 **Spasova M I, P.T.W., Folkertsma R T, et al.** (2001). The tomato gene Sw-5 is a member of the  
887 coiled coil, nucleotide binding, leucine-rich repeat class of plant resistance genes and confers  
888 resistance to TSWV in tobacco. *Molecular Breeding*. **7(2)**, 151.
- 889 **Swiderski, M.R., Birker, D., and Jones, J.D.** (2009). The TIR domain of TIR-NB-LRR resistance  
890 proteins is a signaling domain involved in cell death induction. *Mol Plant Microbe Interact* **22**,  
891 157-165.
- 892 **Takemoto, D., Rafiqi, M., Hurley, U., Lawrence, G.J., Bernoux, M., Hardham, A.R., Ellis, J.G.,**  
893 **Dodds, P.N., and Jones, D.A.** (2012). N-terminal motifs in some plant disease resistance  
894 proteins function in membrane attachment and contribute to disease resistance. *Mol Plant*  
895 *Microbe Interact* **25**, 379-392.
- 896 **Takken, F.L.W., and Goverse, A.** (2012). How to build a pathogen detector: structural basis of  
897 NB-LRR function. *Current Opinion in Plant Biology* **15**, 375-384.
- 898 **Taliansky, M., Torrance, L., and Kalinina, N.O.** (2008). Role of plant virus movement proteins.  
899 *Methods Mol Biol* **451**, 33-54.
- 900 **Tameling, W.I., Nooijen, C., Ludwig, N., Boter, M., Slootweg, E., Goverse, A., Shirasu, K., and**  
901 **Joosten, M.H.** (2010). RanGAP2 mediates nucleocytoplasmic partitioning of the NB-LRR  
902 immune receptor Rx in the Solanaceae, thereby dictating Rx function. *Plant Cell* **22**,  
903 4176-4194.
- 904 **Tasset, C., Bernoux, M., Jauneau, A., Pouzet, C., Briere, C., Kieffer-Jacquiod, S., Rivas, S.,**  
905 **Marco, Y., and Deslandes, L.** (2010). Autoacetylation of the *Ralstonia solanacearum* effector  
906 PopP2 targets a lysine residue essential for RRS1-R-mediated immunity in Arabidopsis. *PLoS*  
907 *Pathog* **6**, e1001202.
- 908 **Turina, M., Kormelink, R., and Resende, R.O.** (2016). Resistance to Tospoviruses in Vegetable  
909 Crops: Epidemiological and Molecular Aspects. *Annu Rev Phytopathol* **54**, 347-371.
- 910 **van der Vossen, E.A., Gros, J., Sikkema, A., Muskens, M., Wouters, D., Wolters, P., Pereira, A.,**  
911 **and Allefs, S.** (2005). The Rpi-blb2 gene from *Solanum bulbocastanum* is an Mi-1 gene  
912 homolog conferring broad-spectrum late blight resistance in potato. *Plant J* **44**, 208-222.
- 913 **van Wersch, S., and Li, X.** (2019). Stronger When Together: Clustering of Plant NLR Disease  
914 resistance Genes. *Trends Plant Sci* **24**, 688-699.
- 915 **van Wersch, S., Tian, L., Hoy, R., Li, X. .** (2020). Plant NLRs: The whistleblowers of  
916 plant immunity. *Plant communications*, doi: <https://doi.org/10.1016/j.xplc.2019.100016>.
- 917 **Vos, P., Simons, G., Jesse, T., Wijbrandi, J., Heinen, L., Hogers, R., Frijters, A., Groenendijk, J.,**  
918 **Diergaarde, P., Reijans, M., Fierens-Onstenk, J., de Both, M., Peleman, J., Liharska, T.,**  
919 **Hontelez, J., and Zabeau, M.** (1998). The tomato Mi-1 gene confers resistance to both  
920 root-knot nematodes and potato aphids. *Nat Biotechnol* **16**, 1365-1369.
- 921 **Vossen, J.H., van Arkel, G., Bergervoet, M., Jo, K.R., Jacobsen, E., and Visser, R.G.** (2016). The  
922 *Solanum demissum* R8 late blight resistance gene is an Sw-5 homologue that has been

- 923 deployed worldwide in late blight resistant varieties. *Theor Appl Genet* **129**, 1785-1796.
- 924 **Wan, L., Essuman, K., Anderson, R.G., Sasaki, Y., Monteiro, F., Chung, E.H., Osborne**  
925 **Nishimura, E., DiAntonio, A., Milbrandt, J., Dangl, J.L., and Nishimura, M.T.** (2019).  
926 TIR domains of plant immune receptors are NAD(+)-cleaving enzymes that promote cell  
927 death. *Science* **365**, 799-803.
- 928 **Wang, A.** (2015). Dissecting the molecular network of virus-plant interactions: the complex roles of  
929 host factors. *Annu Rev Phytopathol* **53**, 45-66.
- 930 **Wang, J., Hu, M., Wang, J., Qi, J., Han, Z., Wang, G., Qi, Y., Wang, H.W., Zhou, J.M., and**  
931 **Chai, J.** (2019a). Reconstitution and structure of a plant NLR resistosome conferring  
932 immunity. *Science* **364**.
- 933 **Wang, J., Wang, J., Hu, M., Wu, S., Qi, J., Wang, G., Han, Z., Qi, Y., Gao, N., Wang, H.W.,**  
934 **Zhou, J.M., and Chai, J.** (2019b). Ligand-triggered allosteric ADP release primes a plant  
935 NLR complex. *Science* **364**.
- 936 **Wang, J., Chen, T., Han, M., Qian, L., Li, J., Wu, M., Han, T., Cao, J., Nagalakshmi, U., Rathjen,**  
937 **J.P., Hong, Y., and Liu, Y.** (2020). Plant NLR immune receptor Tm-22 activation requires  
938 NB-ARC domain-mediated self-association of CC domain. *PLoS Pathog* **16**, e1008475.
- 939 **Wen, W., Meinkoth, J.L., Tsien, R.Y., and Taylor, S.S.** (1995). Identification of a signal for rapid  
940 export of proteins from the nucleus. *Cell* **82**, 463-473.
- 941 **Wirthmueller, L., Zhang, Y., Jones, J.D., and Parker, J.E.** (2007). Nuclear accumulation of the  
942 *Arabidopsis* immune receptor RPS4 is necessary for triggering EDS1-dependent defense. *Curr*  
943 *Biol* **17**, 2023-2029.
- 944 **Zhao, W., Jiang, L., Feng, Z., Chen, X., Huang, Y., Xue, F., Huang, C., Liu, Y., Li, F., Liu, Y.,**  
945 **and Tao, X.** (2016). Plasmodesmata targeting and intercellular trafficking of Tomato spotted  
946 wilt tospovirus movement protein NSm is independent of its function in HR induction. *J Gen*  
947 *Viro* **97**, 1990-1997.
- 948 **Zhu, M., van Grinsven, I.L., Kormelink, R., and Tao, X.** (2019). Paving the Way to Tospovirus  
949 Infection: Multilined Interplays with Plant Innate Immunity. *Annu Rev Phytopathol* **57**, 41-62.
- 950 **Zhu, M., Jiang, L., Bai, B., Zhao, W., Chen, X., Li, J., Liu, Y., Chen, Z., Wang, B., Wang, C., Wu,**  
951 **Q., Shen, Q., Dinesh-Kumar, S.P., and Tao, X.** (2017). The Intracellular Immune Receptor  
952 Sw-5b Confers Broad-Spectrum Resistance to Tospoviruses through Recognition of a  
953 Conserved 21-Amino Acid Viral Effector Epitope. *Plant Cell* **29**, 2214-2232.

954

955

956

957

958

## 959 **FIGURE LEGENDS**

960 **Figure 1. Subcellular localization of Sw-5b in *N. benthamiana* and tomato leaf**

961 **cells.** (A) A schematic diagram of Sw-5b. (B) Subcellular localization of free YFP,  
962 YFP-Sw-5b and autoactive YFP-Sw-5b<sup>D857V</sup> mutant in *N. benthamiana* leaf cells at 24  
963 hours post agro-infiltration (hpai). (C) Subcellular localization of free YFP,  
964 YFP-Sw-5b and autoactive YFP-Sw-5b<sup>D857V</sup> mutant in tomato leaf cells at 24 hpai. N,  
965 nucleus; C, cytoplasm. Bar = 10  $\mu$ m. The numbers in each image indicate the number  
966 of cells showing this subcellular localization pattern and the total number of cells  
967 examined per treatment. (D) Western blot analysis of YFP-Sw-5b and  
968 YFP-Sw-5b<sup>D857V</sup> accumulation in the total protein (T), cytoplasmic (C), and nuclear  
969 (N) fractionations using antibodies against YFP, actin and histone, respectively.  
970 Leaves infiltrated with EV were used as a control. The expressions of actin and  
971 histone were used as a cytoplasmic and a nuclear marker, respectively. The Ponceau S  
972 stained gel was used to show a cytoplasmic marker.

973

974 **Figure 2. Sw-5b activity on HR cell death induction in the cytoplasm and in the**  
975 **nucleus.** (A) Confocal images of *N. benthamiana* leaf cells expressing  
976 NES-YFP-Sw-5b, nes-YFP-Sw-5b, NLS-YFP-Sw-5b and nls-YFP-Sw-5b fusion,  
977 respectively. All the images were taken at 24–36 hpai. The numbers in each image  
978 indicate the number of cells showing this subcellular localization pattern and the total  
979 number of cells examined per treatment. N, nucleus; C, cytoplasm. Bar = 10  $\mu$ m. (B)  
980 Induction of HR in *N. benthamiana* leaf areas co-expressing NSm and one of the five  
981 Sw-5b fusions. The infiltrated *N. benthamiana* leaf was photographed at 2 dpai (left  
982 image) and the same leaf was stained with trypan blue to show the intence of HR cell

983 death (right image). (C) Western blot analysis of YFP-Sw-5b, NES-YFP-Sw-5b,  
984 nes-YFP-Sw-5b, NLS-YFP-Sw-5b, and nls-YFP-Sw-5b in the infiltrated *N.*  
985 *benthamiana* leaf tissues. These fusions were enriched using the GFP-Trap beads  
986 prior to SDS-PAGE, and the resulting blot was probed using an YFP specific antibody.  
987 The Ponceau S stained gel was used to show sample loadings. (D) Time course study  
988 of ion leakage in the *N. benthamiana* leaf tissues co-expressing NSm and one of the  
989 five Sw-5b fusions. The leaf tissues co-expressing NSm and EV were used as controls.  
990 Measurements were performed at 4 h intervals starting from 24 hpai to 48 hpai. Error  
991 bars were calculated using the data from three biological replicates per treatment per  
992 time point.

993

994 **Figure 3. Effects of cytoplasmic and nuclear Sw-5b on inhibition of viral**  
995 **replication in *N. benthamiana*.** (A) Schematic representations of TSWV-based  
996 mini-genome replicons. SR<sub>(+)eGFP</sub>, a mini-genome replicon expressing TSWV N and  
997 eGFP; L<sub>(+)opt</sub>, TSWV L genomic replicon expressing a codon usage optimized TSWV  
998 RdRp; NSm, Wild type TSWV NSm expressed by 35S promoter in p2300S vector;  
999 NSm<sup>H93A&H94A</sup>, a movement defective NSm; (-), the negative (genomic)-strand of  
1000 tospovirus RNA; 35S, a double 35S promoter; HH, a hammerhead ribozyme; RZ, a  
1001 hepatitis delta virus ribozyme; NOS, a nopaline synthase terminator; 35S Ter, a 35S  
1002 transcription terminator. (B) Images of *N. benthamiana* leaf tissues co-expressing of  
1003 SR<sub>(+)eGFP</sub>, L<sub>(+)opt</sub>, NSm<sup>H93A&H94A</sup>, and EV, Sw-5b, NES-Sw-5b, nes-Sw-5b,  
1004 NLS-Sw-5b, or nls-Sw-5b. All the tissues were imaged at 4 dpai under a fluorescence

1005 microscope. Bar = 400  $\mu$ m. (C) Western blot analysis of various fusion proteins in leaf  
1006 samples shown in panel (B) using an antibody against YFP. The Ponceau S stained  
1007 rubisco large subunit was used to show sample loadings.

1008

1009 **Figure 4. Nucleocytoplasm-, cytoplasm- and nuclear-accumulated Sw-5b activity**  
1010 **on NSm cell-to-cell movement in *N. benthamiana* leaves.** (A) A schematic diagram  
1011 showing a vector expressing both mCherry-HDEL and NSm-GFP. (B) Cell-to-cell  
1012 movement of NSm-GFP in the *N. benthamiana* leaves co-expressing mCherry-HDEL,  
1013 NSm-GFP and EV, Sw-5b, NES-Sw-5b or NLS-Sw-5b through agro-infiltration. The  
1014 *Agrobacterium* culture carrying pmCherry-HDEL//NSm-GFP was first adjusted to  
1015 OD<sub>600</sub> = 0.2, and then diluted 500 times prior to infiltration. Other *Agrobacterium*  
1016 cultures were adjusted to OD<sub>600</sub> = 0.2 prior to use. The numbers in each image  
1017 indicate the number of cells showing this cell-to-cell movement pattern and the total  
1018 number of cells examined per treatment. Bar = 50  $\mu$ m.

1019

1020 **Figure 5. Cytoplasmic and nuclear Sw-5b activity on inducing host immunity to**  
1021 **TSWV systemic infection.** (A) Systemic infection analysis of TSWV in  
1022 NES-YFP-Sw-5b, nes-YFP-Sw-5b, NLS-YFP-Sw-5b, nls-YFP-Sw-5b, YFP-Sw-5b or  
1023 EV transgenic *N. benthamiana* plants. Transgenic *N. benthamiana* plants driven by  
1024 the 35S promoter were used in this experiment. The inoculated plants were  
1025 photographed at 15 dpi. White arrow indicates the systemic leaves showing HR  
1026 trailing. White arrow indicate systemic leaves showing mosaic symptoms. (B)



1027 Western blot analyses of NES-YFP-Sw-5b, nes-YFP-Sw-5b, NLS-YFP-Sw-5b,  
1028 nls-YFP-Sw-5b, and YFP-Sw-5b accumulations in the transgenic *N. benthamiana*  
1029 lines driven by the 35S promoter . The EV transgenic line was used as a negative  
1030 control. (C) RT-PCR detection of TSWV infection in the systemic leaves of different  
1031 transgenic *N. benthamiana* lines at 15 dpi.

1032

1033 **Figure 6. Validation of Sw-5b nucleus localization and its role in host immunity**

1034 **to TSWV systemic infection.** (A) Expressions of *importin*

1035  $\alpha 1$  (IMP  $\alpha 1$  KD),  $\alpha 2$  (IMP  $\alpha 2$  KD),  $\alpha 1$  and  $\alpha 2$  (IMP  $\alpha 1$  &  $\alpha 2$  KD),  $\beta$  (IMP  $\beta$  KD), *i*

1036 *mportin*  $\alpha 1$ ,  $\alpha 2$  and  $\beta$  (IMP  $\alpha 1$  &  $\alpha 2$  &  $\beta$  KD) were silenced, respectively, in the

1037 YFP-Sw-5b transgenic *N. benthamiana* through VIGS followed by Confocal

1038 Microscopy analysis at 26 hpai. N, nucleus; C, cytoplasm. Bar = 10  $\mu$ m. The numbers

1039 in each image indicate the number of cells showing this subcellular localization

1040 pattern and the total number of cells examined per treatment. (B) The gene silenced

1041 Sw-5b transgenic *N. benthamiana* plants were inoculated with TSWV. The inoculated

1042 plants were photographed at 15 dpi. The white arrow indicates HR trailing in systemic

1043 leaves. The numbers in each image indicate the number of plants showing this

1044 virus-infected phenotype pattern and the total number of plants tested per treatment.

1045

1046 **Figure 7. Additive effect of cytoplasmic and nuclear Sw-5b on host immunity to**

1047 **TSWV infection.** (A) Schematic representations of constructs:  $M_{(-)opt}$ - $SR_{(+)eGFP}$  carry

1048 both full length TSWV M segment and  $SR_{(+)eGFP}$  mini-replicon to express NSm,

1049 TSWV N, and eGFP in the same cell and  $L_{(+)\text{opt}}$  carrying a full length antigenomic L  
1050 segment to express a codon usage optimized RdRp ( $RdRp_{\text{opt}}$ ). 2x35S, doubled 35S  
1051 promoter; HH, hammerhead ribozyme; RZ, hepatitis delta virus ribozyme; NOS,  
1052 nopaline synthase terminator. (B) *N. benthamiana* leaves co-expressing  
1053  $M_{(-)\text{opt}}\text{-SR}_{(+)\text{eGFP}}$ ,  $L_{(+)\text{opt}}$  and EV, Sw-5b, NES-Sw-5b, NLS-Sw-5b, or NES-Sw-5b +  
1054 NLS-Sw-5b at 4 dpai were examined and imaged under a confocal microscope. The  
1055 numbers in each image indicate the number of leaf areas showed similar expressing  
1056 patterns and the total number of cells examined per treatment. Bar = 400  $\mu\text{m}$ . (C)  
1057 Western blot analysis of eGFP accumulation in assayed leaves shown in panel (B)  
1058 using an GFP specific antibody. The Ponceau S stained Rubisco large subunit gel is  
1059 used to show sample loadings. (D) Quantification of eGFP accumulation in leaves  
1060 shown in panel (C).

1061

1062 **Figure 8. Subcellular localization patterns of Sw-5b domains.** (A) Schematic  
1063 diagrams showing a full length Sw-5b or its domains fused with an YFP. (B) Confocal  
1064 images of *N. benthamiana* leaf epidermal cells expressing various YFP fusions.  
1065 Images were taken at 24 hpai. The numbers in each image indicate the number of cells  
1066 showing this subcellular localization pattern and the total number of cells examined  
1067 per treatment. N, nucleus; C, cytoplasm. Bar = 10  $\mu\text{m}$ .

1068

1069 **Figure 9. A working model for Sw-5b-induced host immunity against tospovirus**  
1070 **infection.** Sw-5b induces different defense responses from different cellular

1071 compartments to combat different tospovirus infection steps. Upon recognition of  
1072 viral NSm in cytoplasm, Sw-5b switches from the autoinhibited state to an activated  
1073 state. The cytoplasmic Sw-5b induces a strong cell death response and a host defense  
1074 to inhibit TSWV replication. Some activated Sw-5b are translocated into nucleus by  
1075 importins. The nuclear-accumulated Sw-5b induces a host defense that weakly  
1076 inhibits TSWV replication, but strongly blocks virus cell-to-cell and long-distance  
1077 movement. Combination of cytoplasmic and nuclear Sw-5b induces a synergistic and  
1078 strong host immunity against tospovirus infection.

1079

#### 1080 **Supporting Information Legends**

1081 **Figure supplemental 1. Sw-5b recognizes TSWV NSm in cytoplasm.** (A) Transient  
1082 expressions of NSm-YFP-NES, NSm-YFP-nes, NSm-YFP-NLS, and NSm-YFP-nls,  
1083 respectively, in *N. benthamiana* leaves through agro-infiltration. Epidermal cells  
1084 expressing various fusion proteins were imaged under a confocal microscope at 24  
1085 hpai. The numbers in each image indicate the number of cells showing this subcellular  
1086 localization pattern and the total number of cells examined per treatment. N, nucleus;  
1087 C, cytoplasm. Bar = 10  $\mu$ m. (B) Various fusion proteins described in (A) were,  
1088 individually, co-expressed with Sw-5b in *N. benthamiana* leaves. A representative leaf  
1089 was photographed at 5 dpai. (C) Western blot analysis of various NSm fusion protein  
1090 expressions in the assayed *N. benthamiana* leaves using an YFP specific antibody.  
1091 Leaf areas co-expressing Sw-5b and EV were used as negative controls. The Ponceau  
1092 S stained Rubisco large subunit gel was used to show sample loadings.

1093

1094 **Figure supplemental 2. Analysis of virus replication monitoring system using a**

1095 **TSWV-based mini-genome replicon and a movement defective NSm mutant. (A)**

1096 SR<sub>(+)eGFP</sub>, L<sub>(+)opt</sub>, VSRs and NSm or NSm<sup>H93A&H94A</sup> mutant were transiently

1097 co-expressed in *N. benthamiana* leaves through agro-infiltration. The infiltrated

1098 leaves were examined and imaged under a confocal microscope at 4 dpai. The

1099 numbers in each image indicate the number of cells showing similar expression

1100 pattern and the total number of cells examined per treatment. Bar = 400  $\mu$ m. (B)

1101 Western blot analysis of eGFP accumulation in assayed leaves using an YFP specific

1102 antibody. Leaves co-expressing SR<sub>(+)eGFP</sub>, L<sub>(+)opt</sub>, VSRs and EV were used as negative

1103 controls. The Ponceau S stained Rubisco large subunit gel was used to show sample

1104 loadings.

1105

1106 **Figure supplemental 3. Effects of nes-Sw-5b and nls-Sw-5b on NSm-GFP**

1107 **cell-to-cell movement.** nes-Sw-5b and nls-Sw-5b were, respectively, co-expressed

1108 with mCherry-HDEL//NSm-GFP in *N. benthamiana* leaves through agro-infiltration.

1109 The Agrobacterium culture carrying pmCherry-HDEL//NSm-GFP was first adjusted

1110 to OD<sub>600</sub> = 0.2 and then further diluted 500 times prior to use. All other

1111 Agrobacterium cultures were adjusted to OD<sub>600</sub> = 0.2 prior to use. The numbers in

1112 each image indicate the number of cells showing similar expression pattern and the

1113 total number of cells examined per treatment. Bar = 50  $\mu$ m.

1114

1115 **Figure supplemental 4. Effects of cytoplasmic and nuclear Sw-5b on host**  
1116 **immunity to TSWV systemic infection.** (A) Transgenic *N. benthamiana* lines  
1117 expressing NES-YFP-Sw-5b, nes-YFP-Sw-5b, NLS-YFP-Sw-5b, nls-YFP-Sw-5b or  
1118 YFP-Sw-5b, driven by the Sw-5b promoter, were used in this study. The EV  
1119 transgenic plants were used as controls. The transgenic plants were inoculated with  
1120 TSWV and photographed at 15 dpi. White arrow indicate the systemic leaves showing  
1121 HR trailing. White arrowhead indicates the systemic leaves showing mosaic  
1122 symptoms. (B) RT-PCR detection of TSWV infection in the systemic leaves of the  
1123 assayed *N. benthamiana* plants at 15 dpi.

1124

1125 **Figure supplemental 5. RT-PCR analyses of *importin*  $\alpha 1$ ,  $\alpha 2$  and  $\beta$  expressions in**  
1126 **the assayed plants and their effects on TSWV systemic infection.** (A) Expressions  
1127 of *importin*  $\alpha 1$ ,  $\alpha 2$ , and  $\beta$  in Sw-5b transgenic *N. benthamiana* plants were silenced  
1128 individually or together using a TRV-based VIGS vector. The gene silencing results  
1129 were determined through semi-quantitative RT-PCR using gene specific primers. PCR  
1130 products obtained after 25 cycles of PCR reaction were visualized in 1% agrose gel  
1131 through electrophoresis. (B) RT-PCR detection of TSWV systemic infection in the  
1132 assayed plants. The resulting PCR products were visualized in 1% agrose gel through  
1133 electrophoresis.

1134

1135 **Figure supplemental 6. Cytoplasmic and nuclear Sw-5b activity on TSWV-GFP**  
1136 **cell-to-cell movement in *N. benthamiana* leaves.** (A) pL<sub>(+)opt</sub> and pSR<sub>(+)eGFP-M<sub>(-)opt</sub></sub>

1137 were co-inoculated with TSWV-GFP into *Nicotiana benthamiana* leaves through  
1138 agro-infiltration. The inoculated leaves were examined and imaged under a confocal  
1139 microscope at 4 dpai. Bar = 400  $\mu$ m. (B) Statistic analysis of TSWV-GFP cell-to-cell  
1140 movement in the assayed *N. benthamiana* leaves from Figure 7B. A total of 9 assayed  
1141 leaves were used for each treatment.

1142

1143 **Figure supplemental 7. Western blot detection of various YFP-tagged Sw-5b**  
1144 **domains in assayed *N. benthamiana* leaves.** The fusion proteins were transiently  
1145 expressed, individually, in *N. benthamiana* leaves. The expressed fusion proteins were  
1146 detected using an YFP specific antibody. Arrows indicate the positions of the  
1147 expressed fusion proteins. The Ponceau S stained Rubisco large subunit gel was used  
1148 to show estimate sample loadings.

1149

1150 **Table supplemental 1. Response of six different types of transgenic *Nicotiana***  
1151 ***benthamiana* plants driven by 35S promoter to TSWV infection**

1152

1153 **Table supplemental 2. Response of six different types of transgenic *Nicotiana***  
1154 ***benthamiana* plants driven by Sw-5b native promoter to TSWV infection**

1155

1156 **Table supplemental 3. List of primers used in this study**

**A**

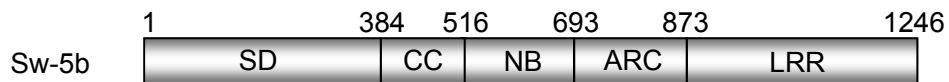

**B**

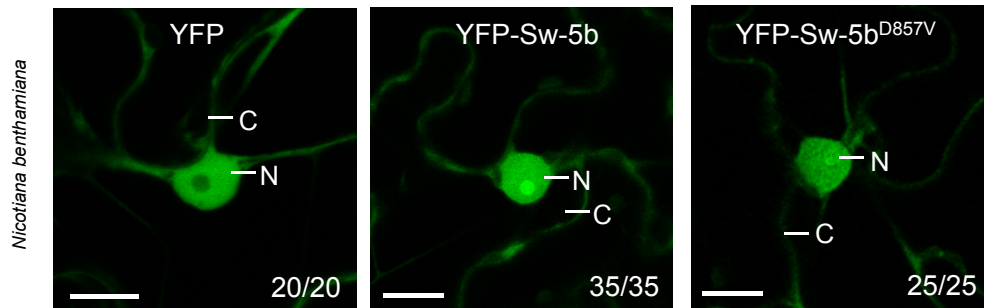

**C**

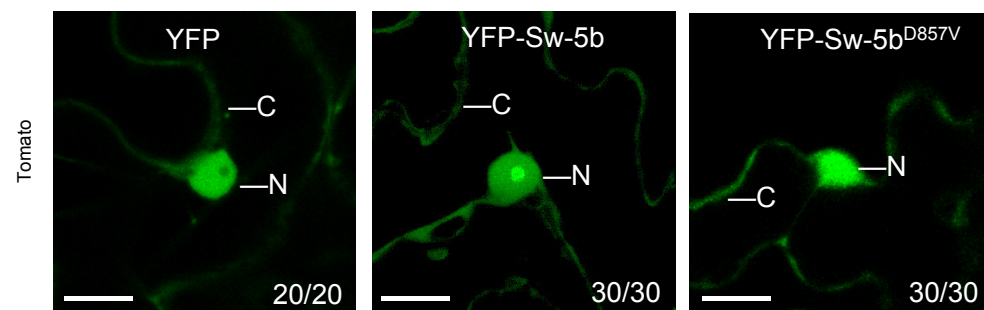

**D**

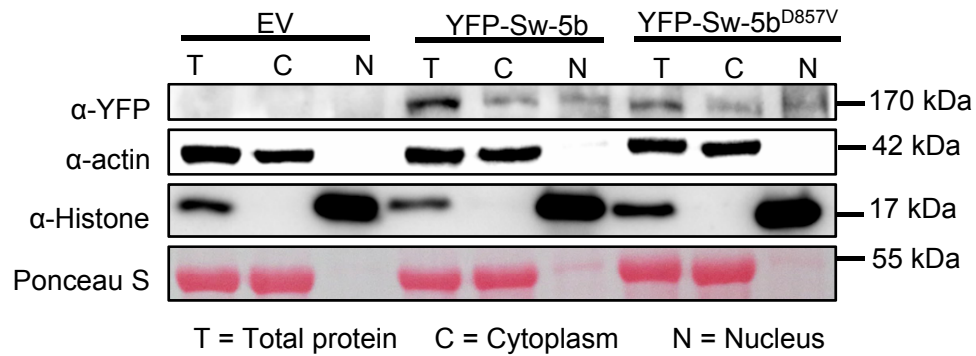

**Figure 1.**

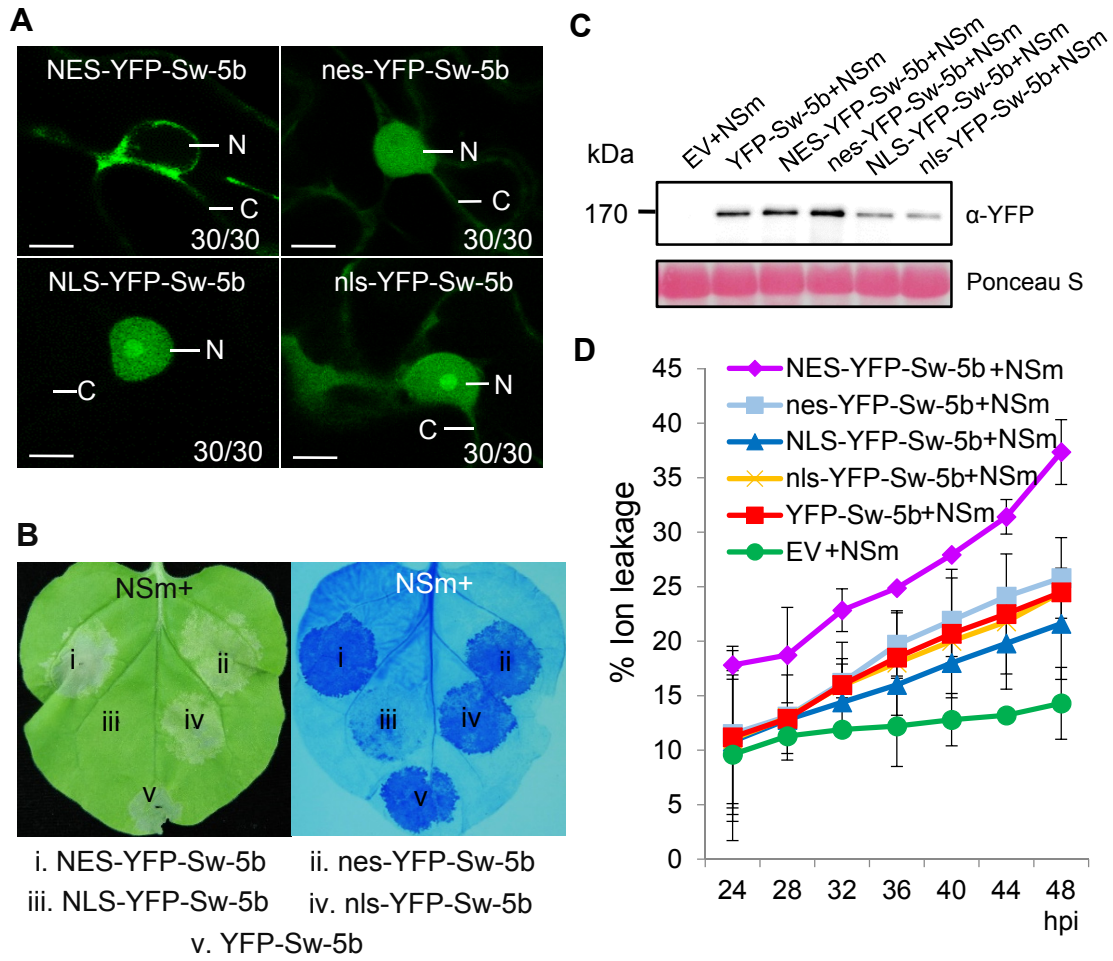

**Figure 2.**



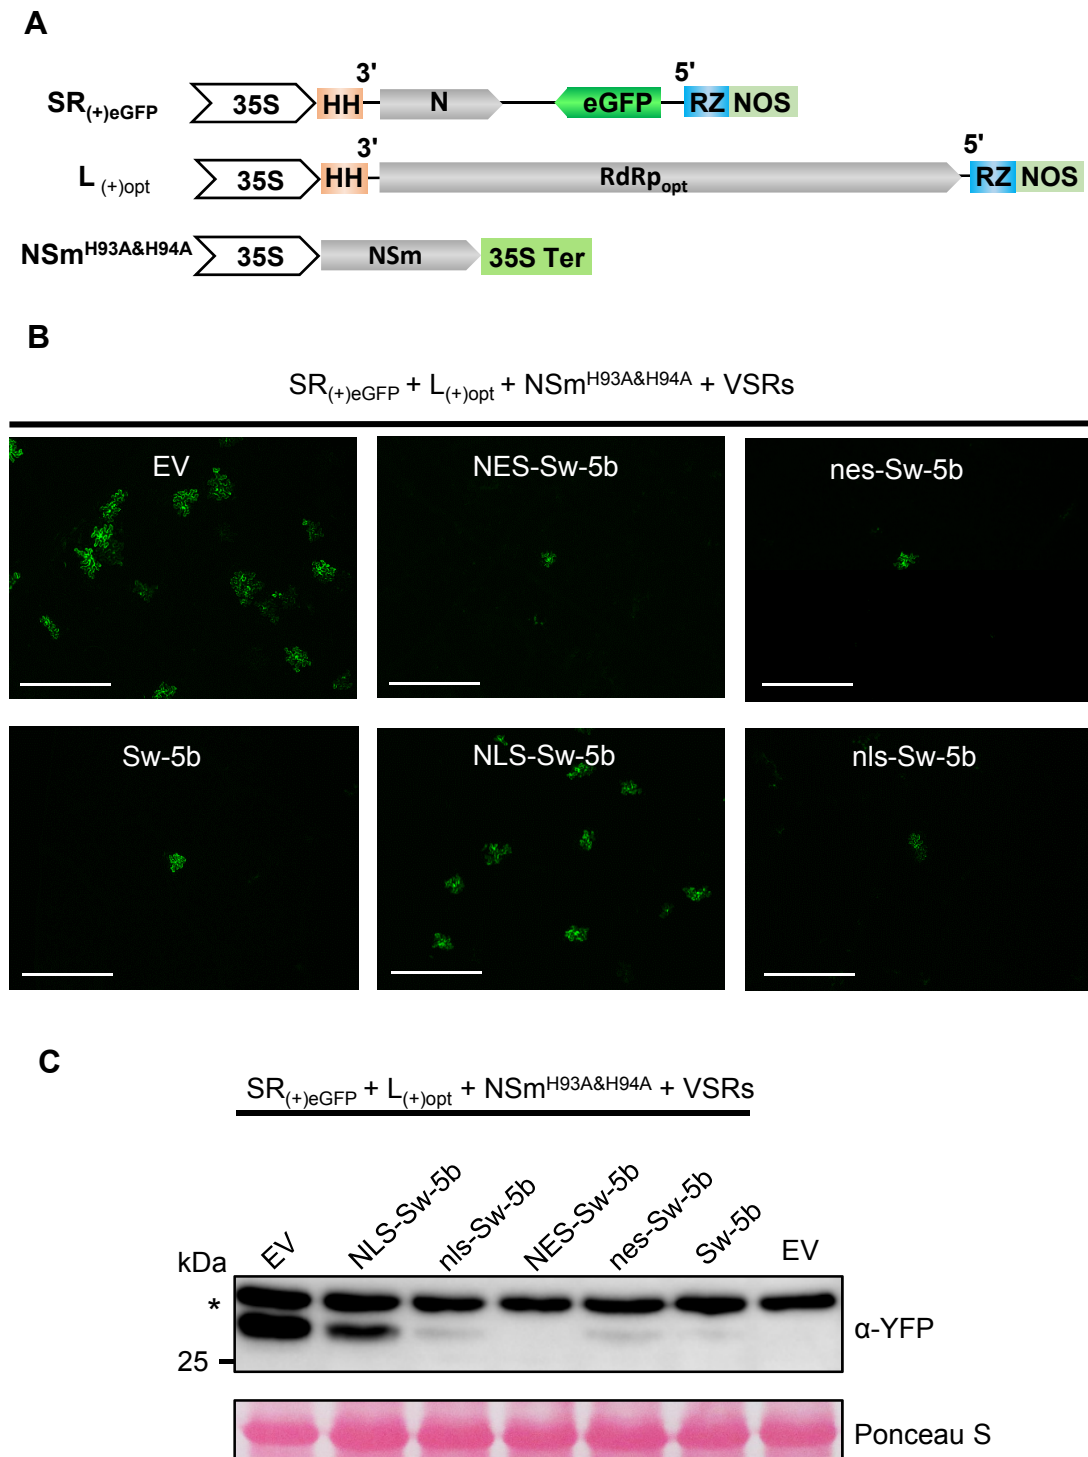

**Figure 3.**

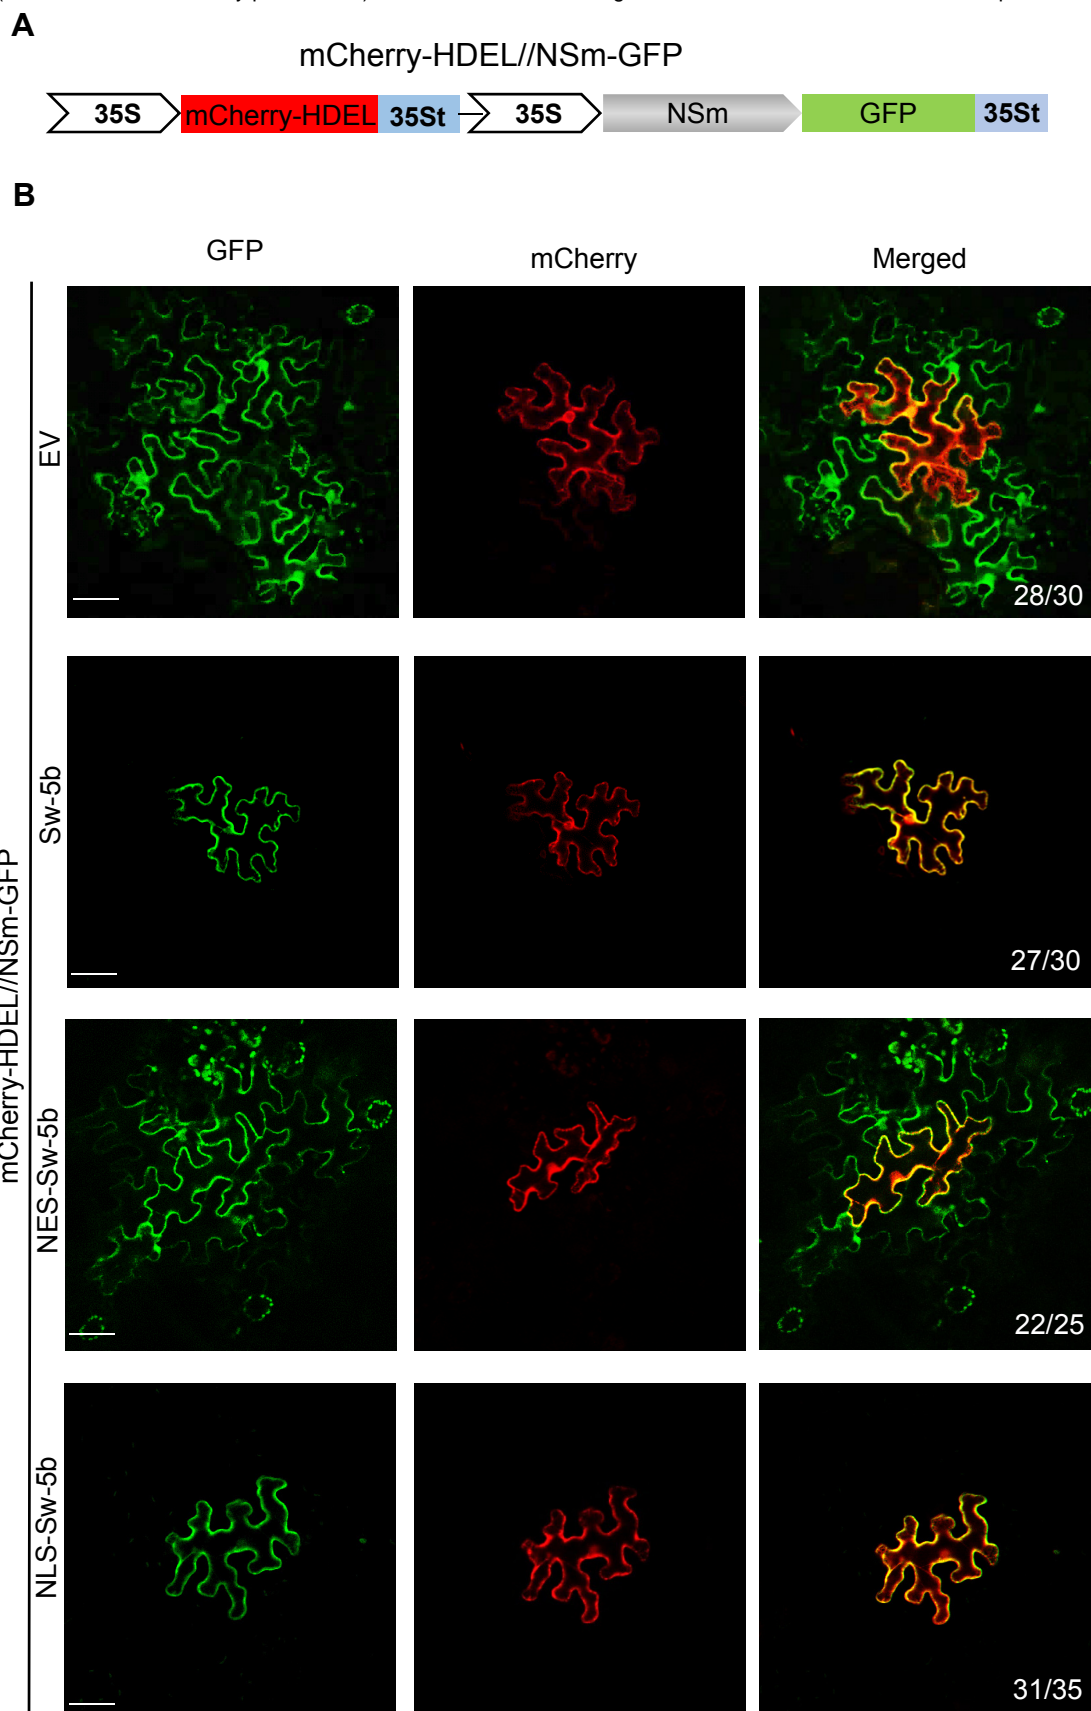

**Figure 4.**

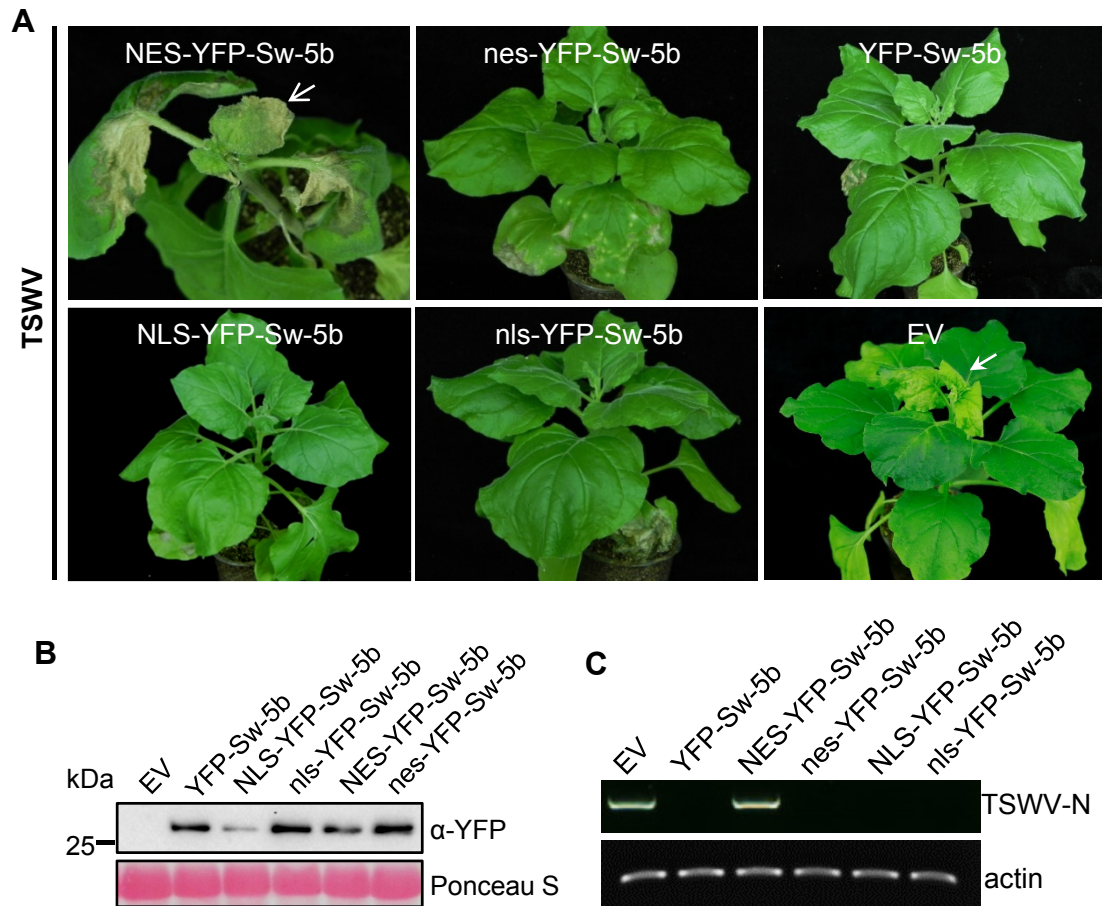

Figure 5.

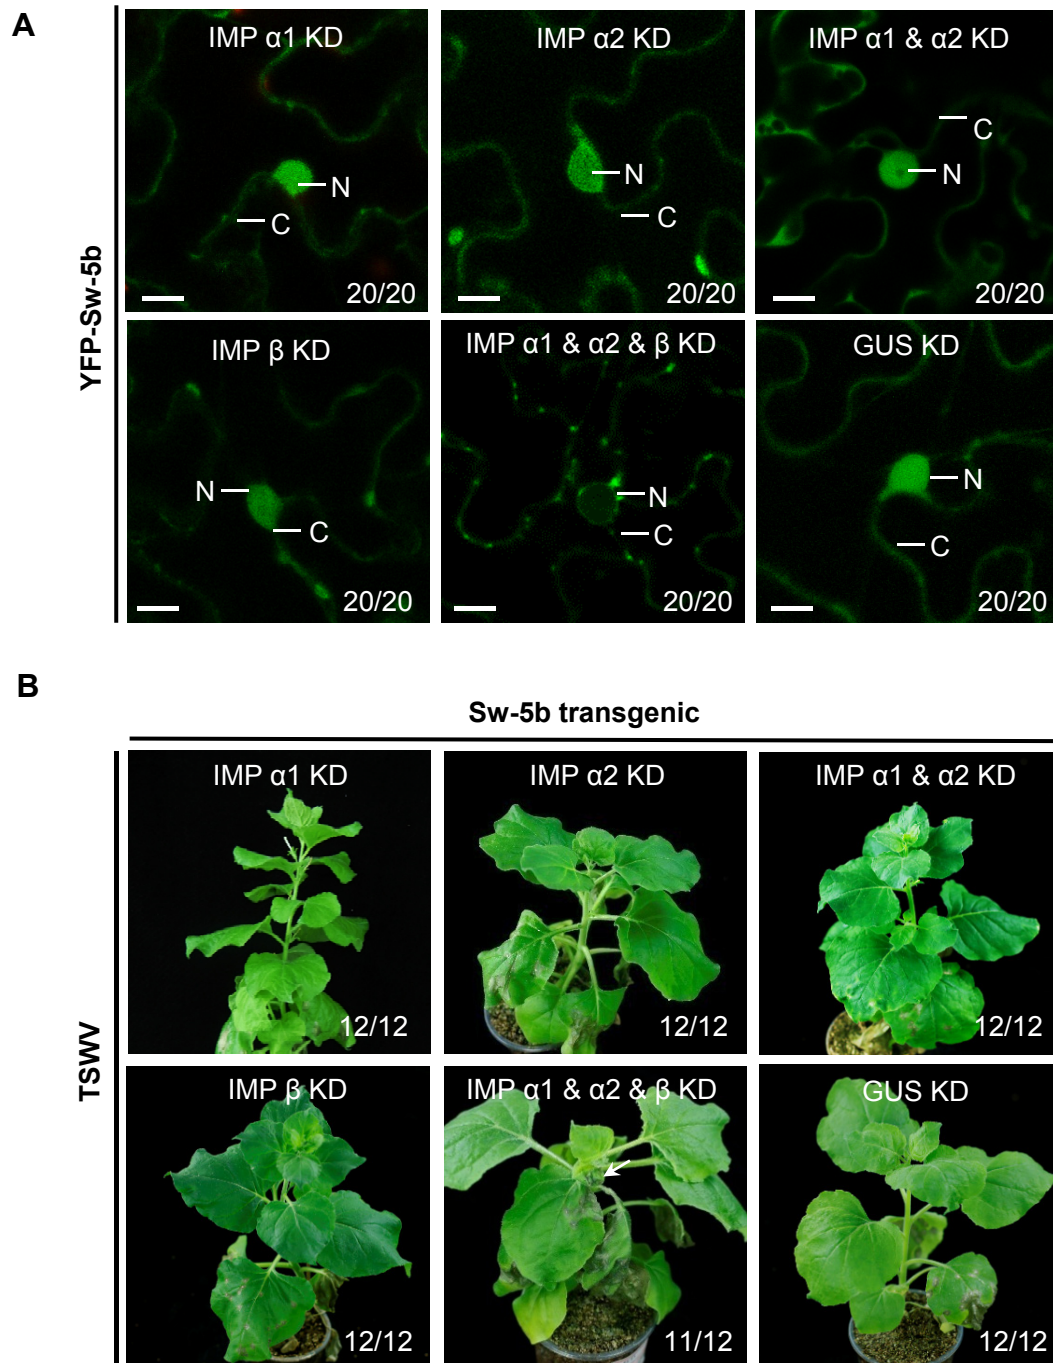

Figure 6

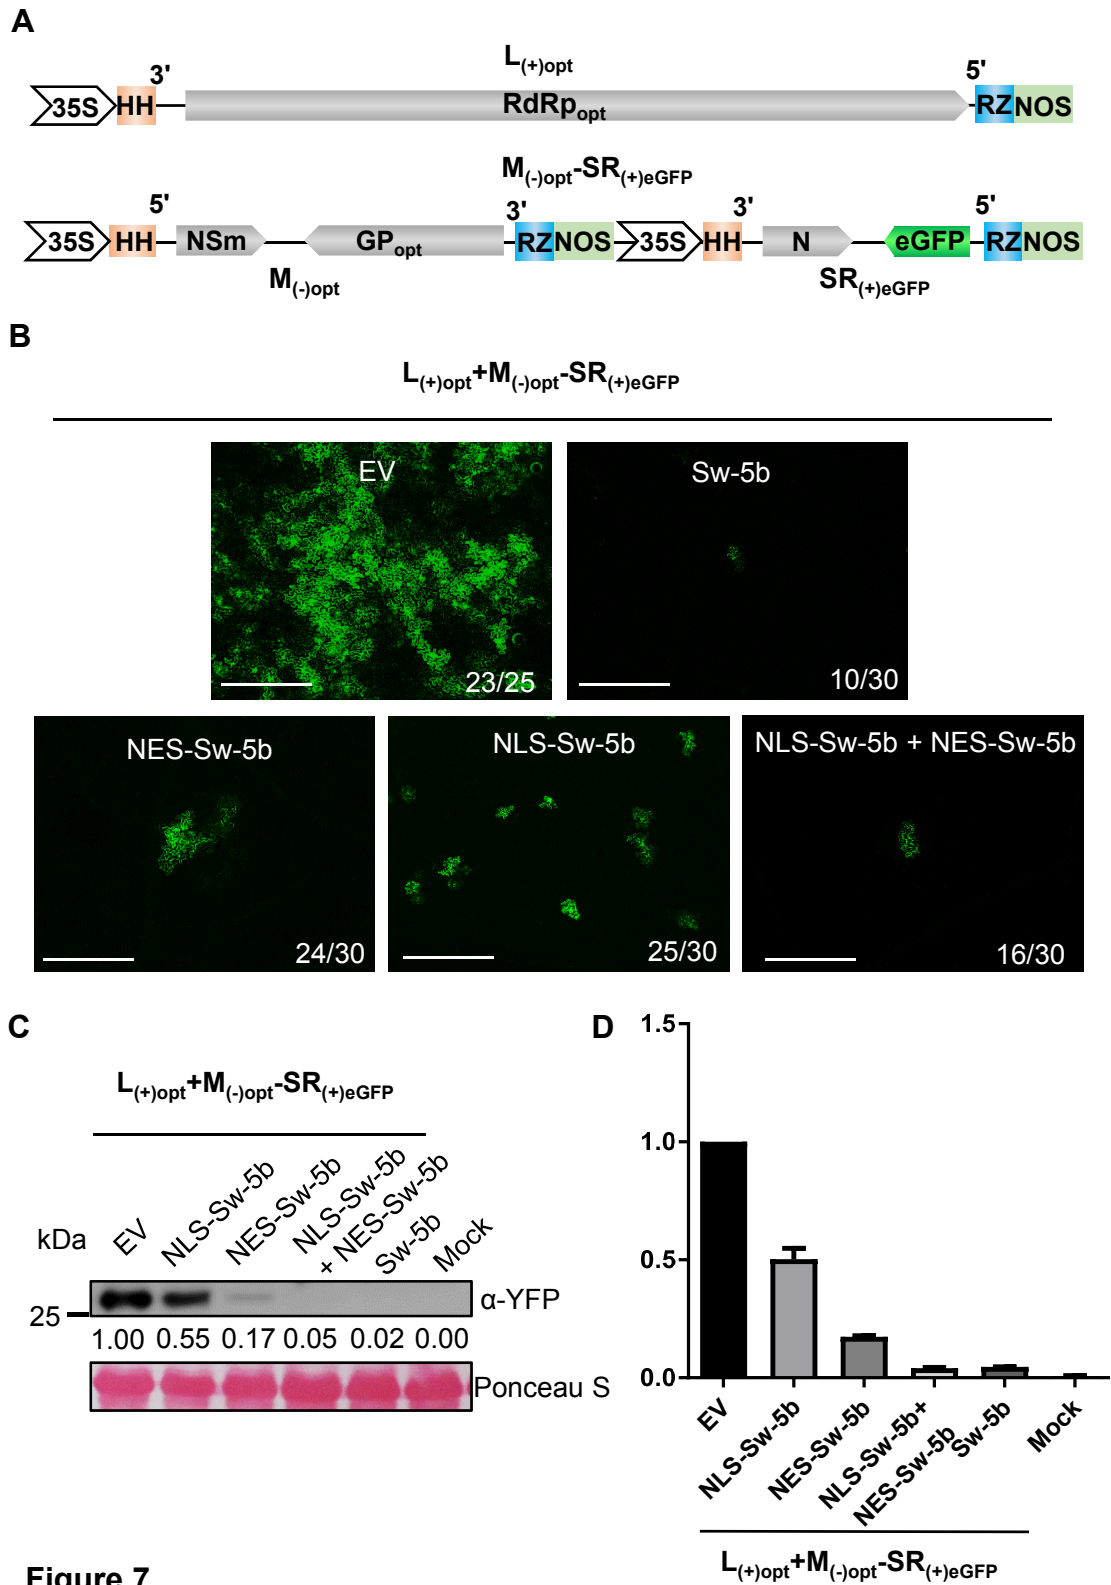

**Figure 7.**

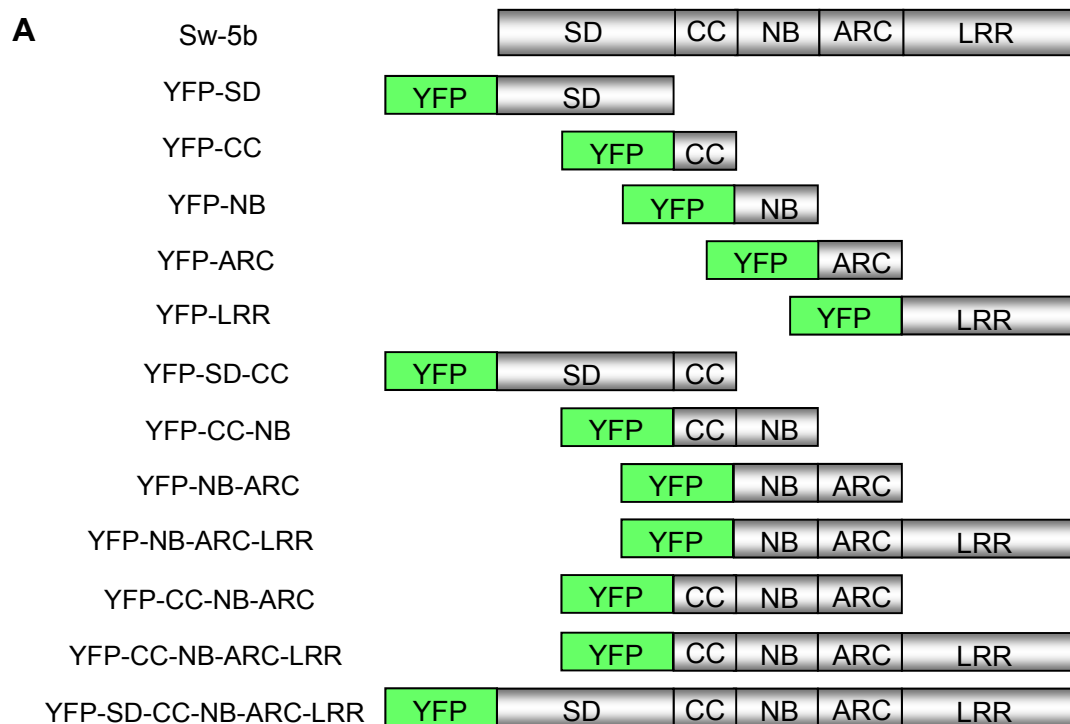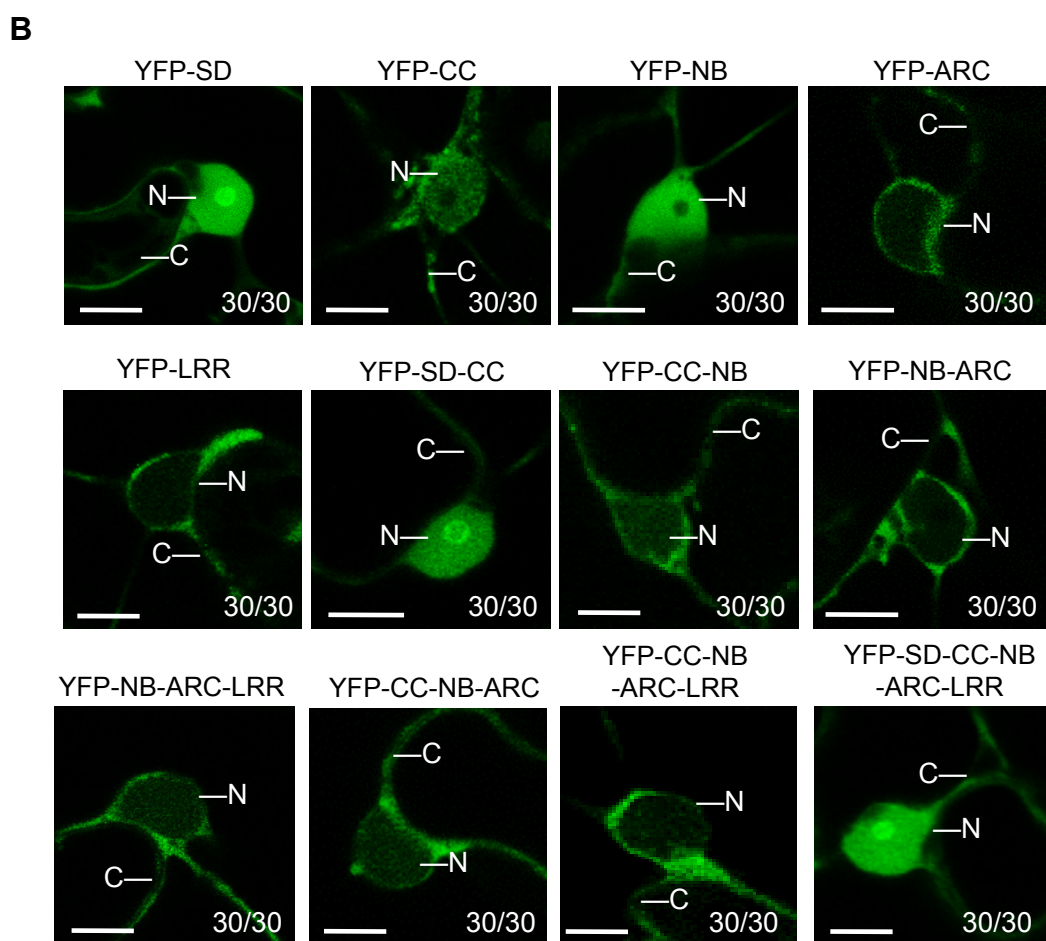

**Figure 8.**

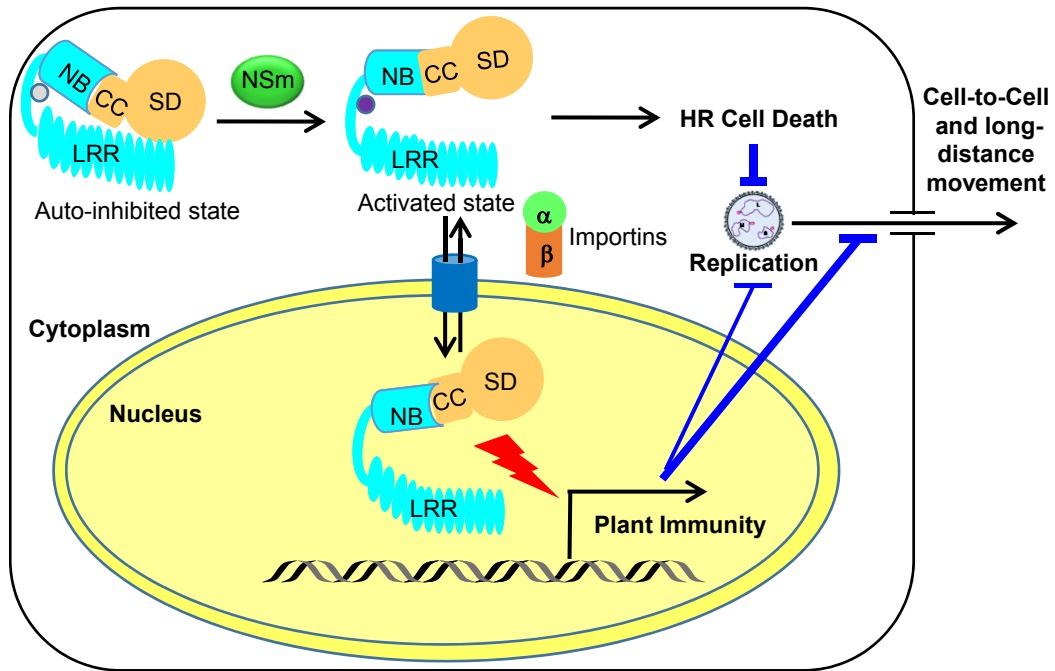

Figure 9.

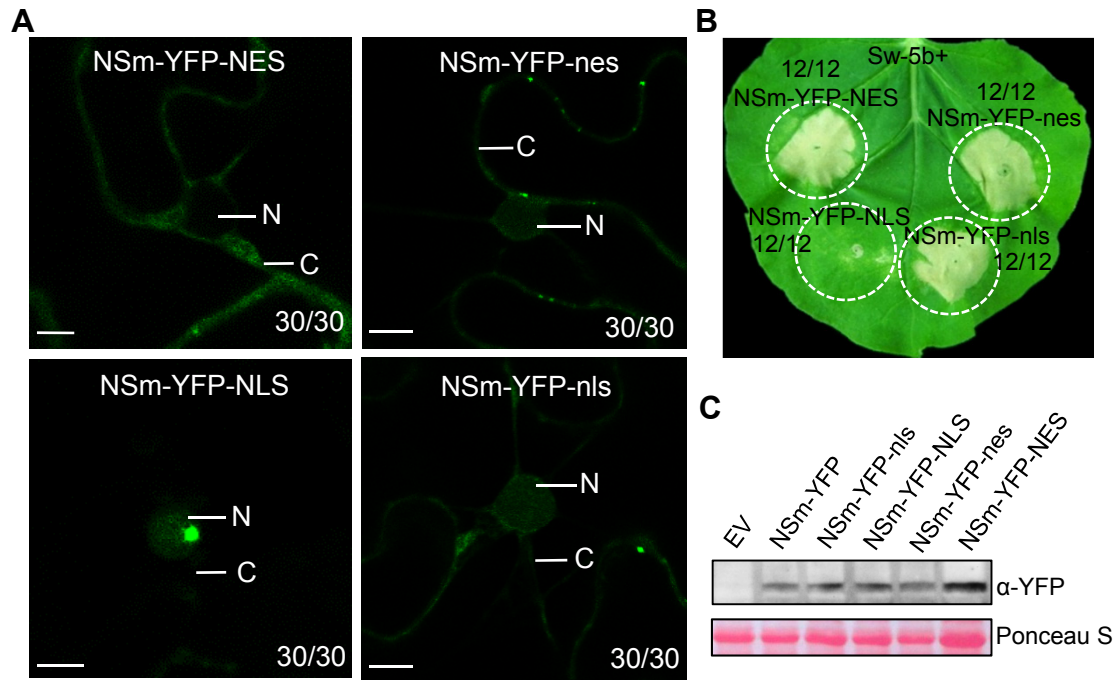

Figure supplement 1.



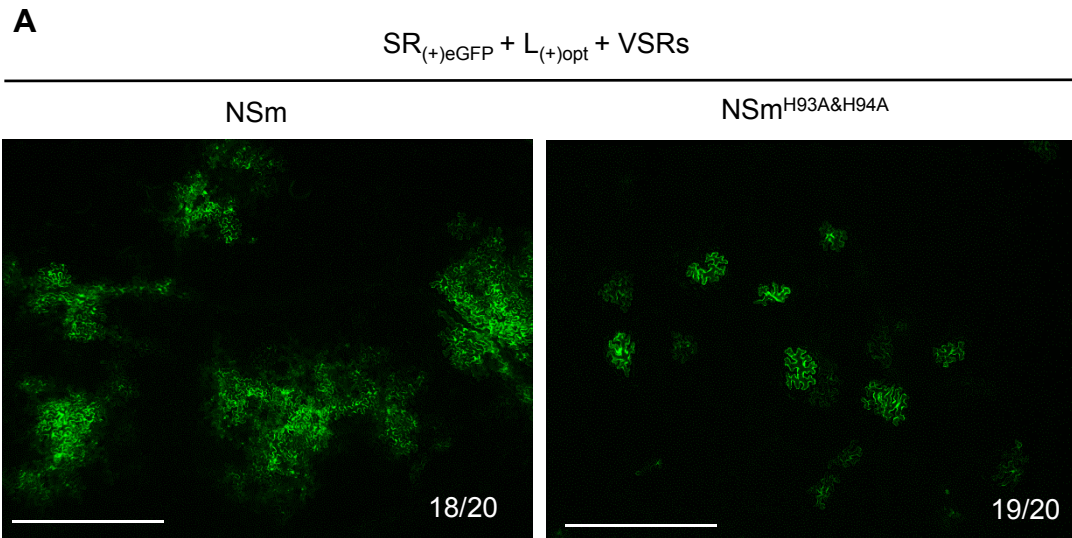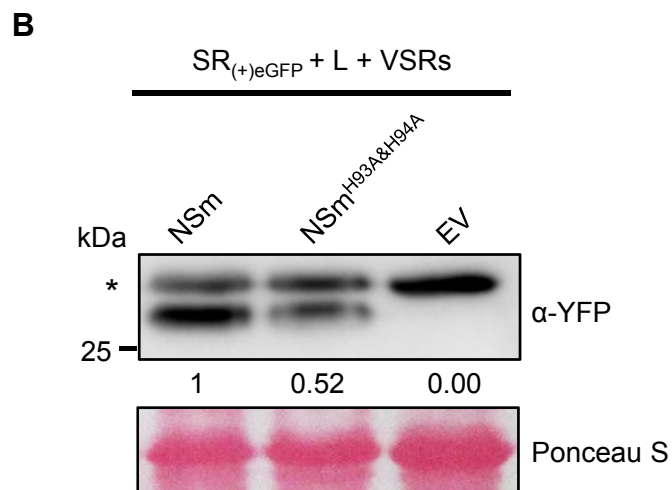

**Figure supplement 2.**

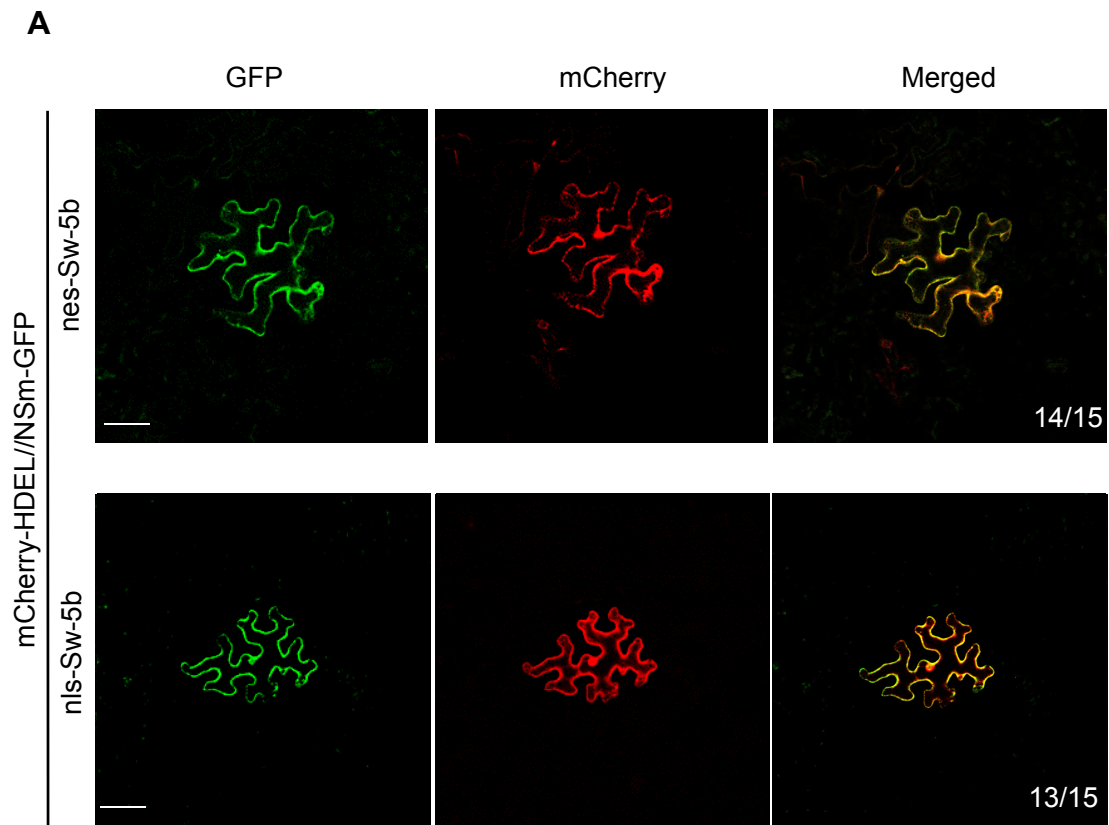

**Figure supplement 3.**

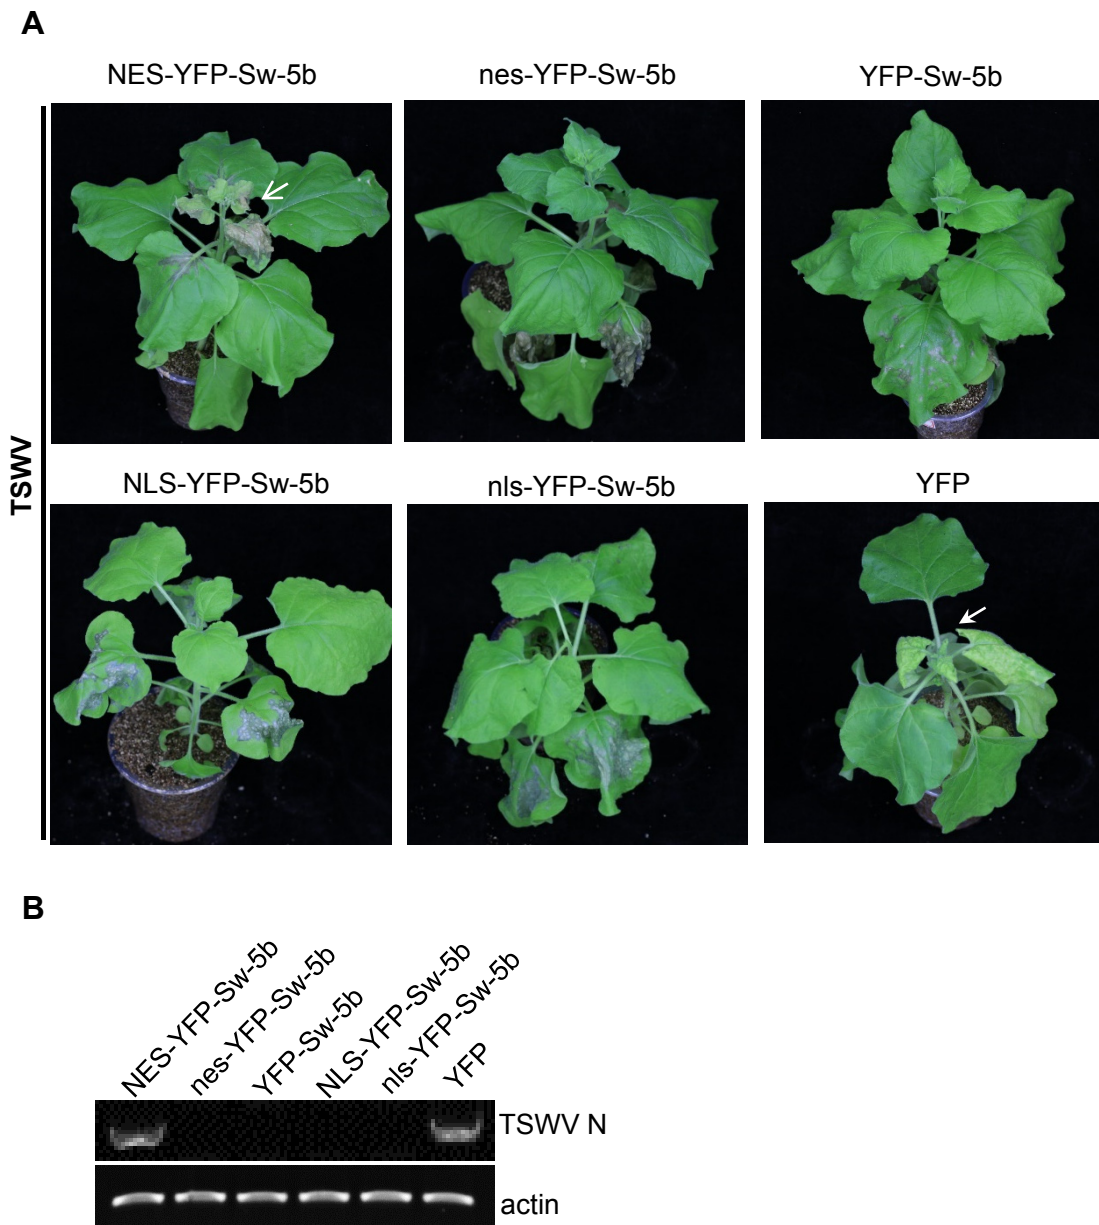

Figure supplement 4.

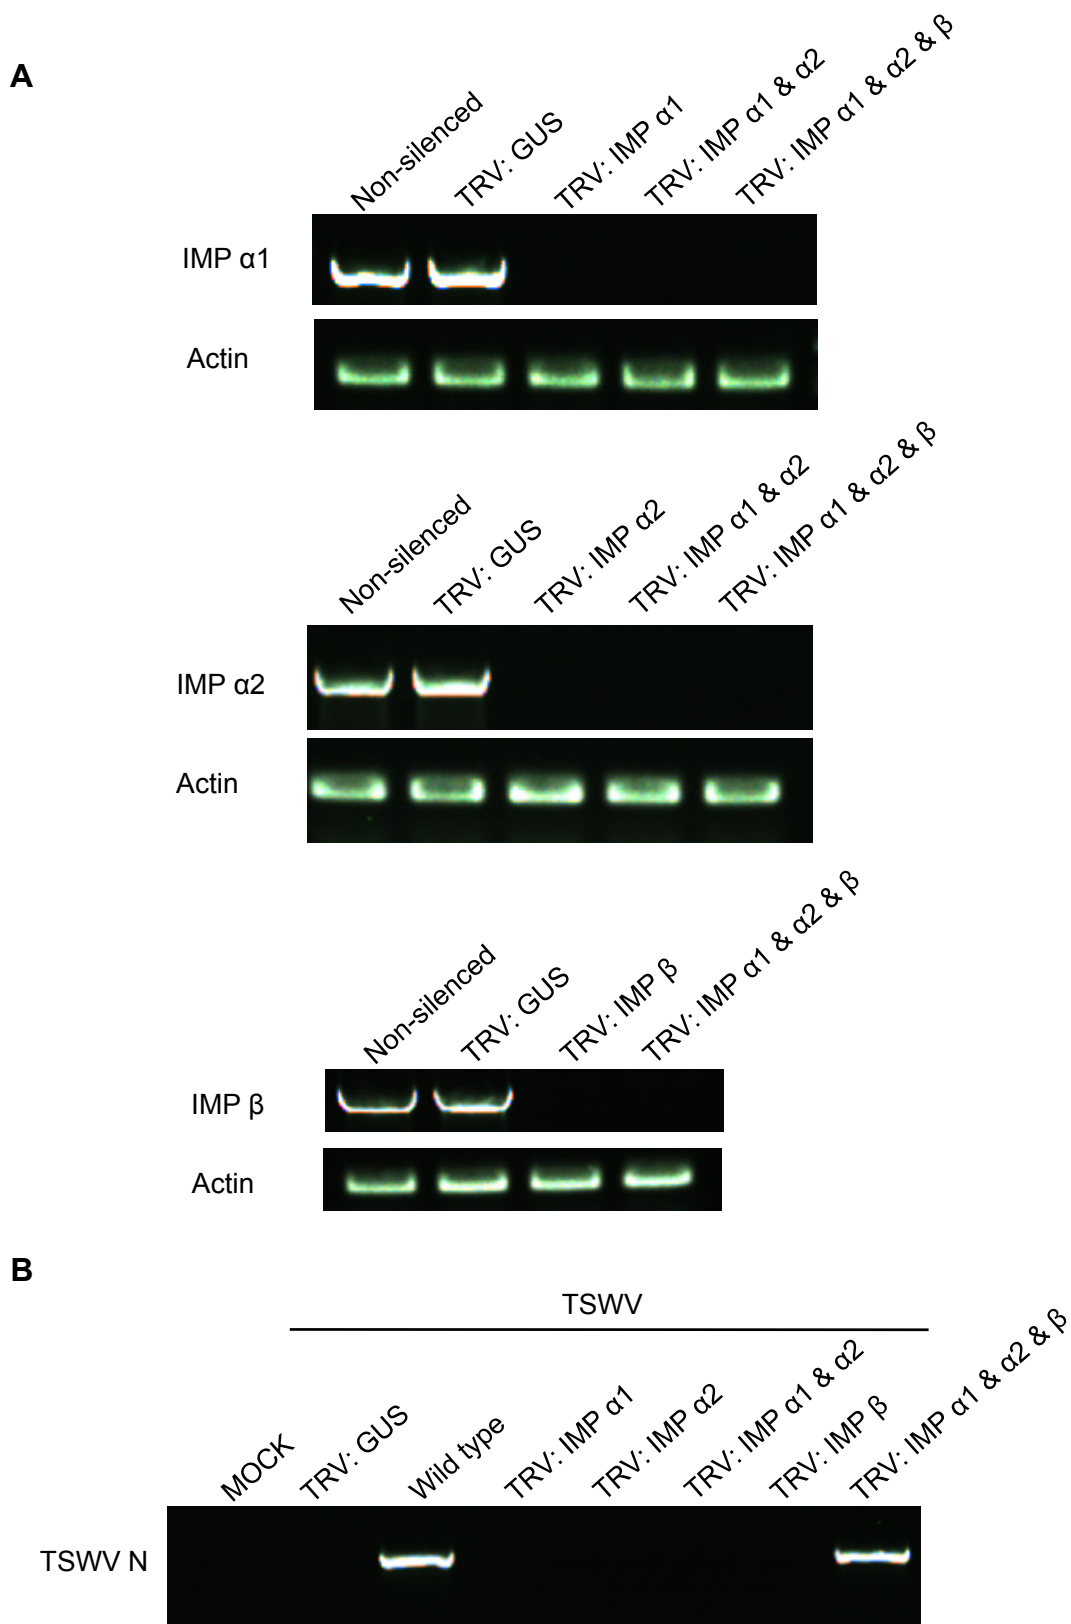

Figure supplement 5.

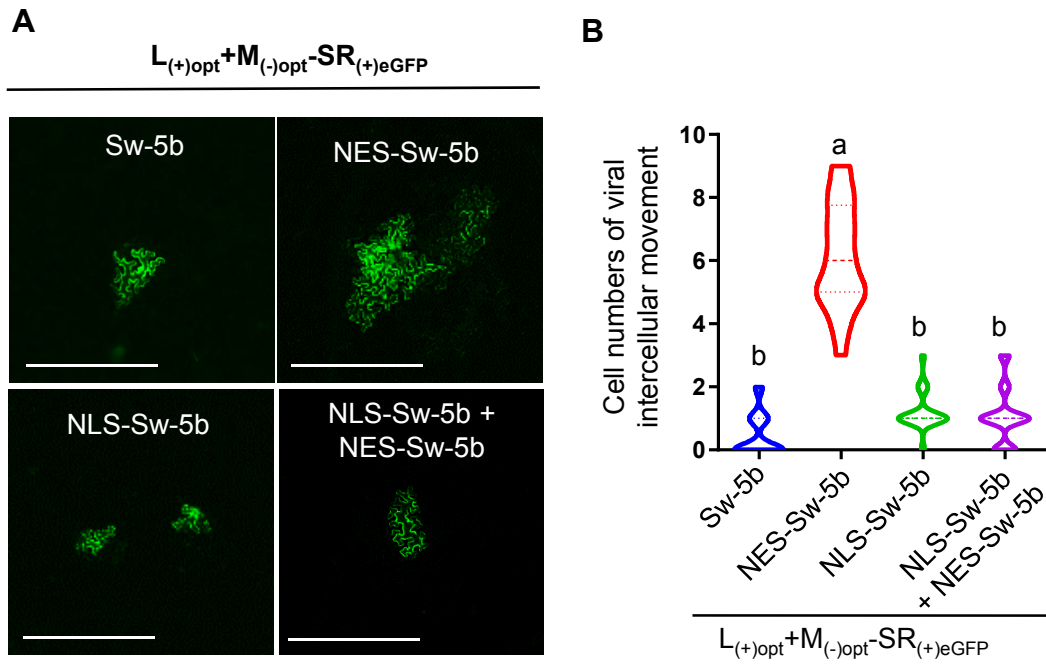

Figure supplement 6.

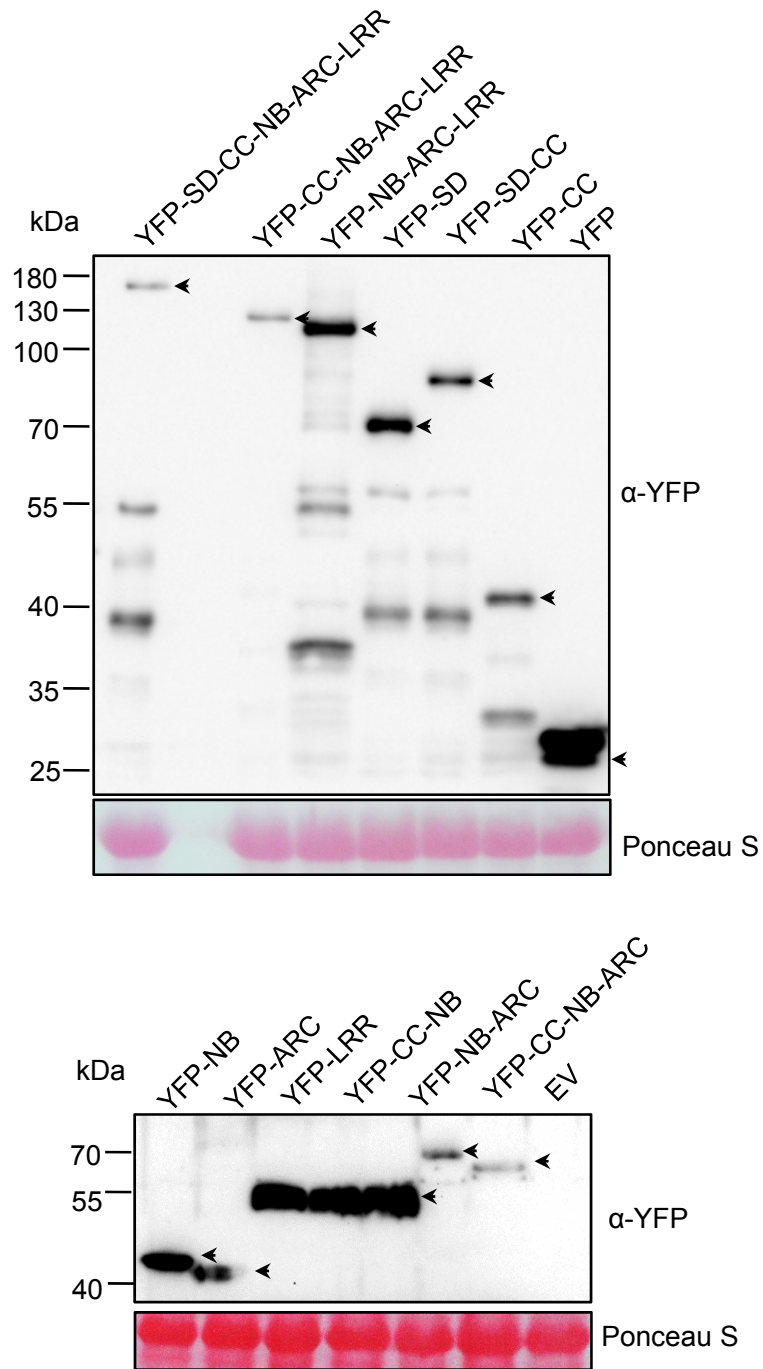

Figure supplement 7.
